# Supplementary material for: Towards a quantitative description of excitonic couplings in photosynthetic pigment–protein complexes: quantum chemistry driven multiscale approaches
Source: Royal Society of Chemistry journal article supplement (doi:10.1039/d1cp03566e), 2022-01-01
Supplement: d1cp03566e1.pdf [file d1cp03566e1.pdf]

## Supporting Information

### Towards a quantitative description of excitonic couplings in photosynthetic pigment-protein complexes: quantum chemistry driven multiscale approaches

Christian Friedl,<sup>1</sup> Dmitri G. Fedorov,<sup>2,\*</sup> Thomas Renger<sup>1,\*</sup>

<sup>1</sup> Institut für Theoretische Physik, Johannes Kepler Universität Linz, Altenberger Str. 69, 4040 Linz, Austria

<sup>2</sup> Research Center for Computational Design of Advanced Functional Materials (CD-FMat), National Institute of Advanced Industrial Science and Technology (AIST), Central 2, Umezono 1-1-1, Tsukuba, 305-8568, Japan.

\* Corresponding author: E-mail address: d.g.fedorov@aist.go.jp (D.G. Fedorov).

\* Corresponding author: E-mail address: thomas.renger@jku.at (T. Renger).

#### Download links for the MEAD program

MEAD was formerly hosted on <http://www.scripps.edu/bashford> and later on <http://stjudere-search.org/site/lab/bashford/>. On both of these sites MEAD is no longer available. The Internet Archive shows that there was a form on the latter site where one could request a copy of MEAD.

<https://web.archive.org/web/20160529023011/http://stjuderesearch.org/site/lab/bashford/>

The GNU General Public License under which MEAD was distributed allows its free redistribution. It is available, e.g., also via the following link: [https://github.com/friedc/MEAD\\_2.2.9](https://github.com/friedc/MEAD_2.2.9)

| <i>M</i> | <i>N</i> | <i>d</i> (Å) | $\vartheta_M$ (°) | $\varphi_M$ (°) | $\vartheta_N$ (°) | $\varphi_N$ (°) |
|----------|----------|--------------|-------------------|-----------------|-------------------|-----------------|
| 3        | 4        | 9.807        | -59.6             | -57.0           | 54.3              | -59.0           |
| 1        | 2        | 9.829        | -59.5             | -61.4           | 53.7              | -59.4           |
| 2        | 3        | 19.203       | -22.4             | 1.7             | 23.5              | -1.1            |
| 1        | 4        | 19.352       | -22.2             | -0.2            | 24.5              | -0.9            |
| 2        | 4        | 20.817       | -26.9             | 32.1            | 29.6              | 30.2            |
| 1        | 3        | 21.194       | -29.0             | 29.5            | 30.8              | 28.9            |

Table S1: Distances and orientations of pigment pairs in WSCP (for structure see Fig. 1 of the main text). The distance  $d=|\mathbf{R}^M-\mathbf{R}^N|$  between chromophores *M* and *N* is measured between the geometric centers of the nitrogen atoms NA, NB, NC, ND of each chromophore respectively (illustrated in Fig. 4 of the main text).  $\vartheta_M$  is the angle between the distance vector  $\mathbf{R}^M-\mathbf{R}^N$  and the XY plane of chromophore *M*.  $\varphi_M$  is the angle in the XY plane between the distance vector and the Y direction of chromophore *M*.  $\vartheta_N$  and  $\varphi_N$  are defined accordingly for chromophore *N*.

## Atomic coordinates, numbering scheme and pigment alignment

| Pigment No | Atom No  | Atom Name | Coordinates |             |             | Vacuum TrESP Charge      | Solvent TrESP Charge     |
|------------|----------|-----------|-------------|-------------|-------------|--------------------------|--------------------------|
| <i>I</i>   | <i>M</i> |           | X (Å)       | Y (Å)       | Z (Å)       | $\tilde{q}_\alpha^M$ (e) | $\tilde{q}_\alpha^M$ (e) |
| 1          | 1        | MG        | 12.32543155 | 40.67719294 | -4.52312936 | -0.0090                  | -0.0107                  |
| 1          | 2        | CHA       | 13.49155542 | 43.17315986 | -6.57991196 | 0.1411                   | 0.1369                   |
| 1          | 3        | CHB       | 14.69984661 | 41.49777587 | -2.22475522 | -0.0544                  | -0.0395                  |
| 1          | 4        | CHC       | 11.15925337 | 38.21592356 | -2.50094710 | -0.1710                  | -0.1706                  |
| 1          | 5        | CHD       | 9.95982478  | 39.85097507 | -6.91920091 | 0.0652                   | 0.0470                   |
| 1          | 6        | NA        | 13.82715323 | 42.16734484 | -4.42050006 | 0.0128                   | 0.0136                   |
| 1          | 7        | C1A       | 14.14237972 | 43.11277535 | -5.37830452 | -0.0974                  | -0.0934                  |
| 1          | 8        | C2A       | 15.26777746 | 44.01662568 | -4.91162684 | -0.1174                  | -0.1069                  |
| 1          | 9        | C3A       | 15.75394503 | 43.31655217 | -3.62813841 | 0.0838                   | 0.0726                   |
| 1          | 10       | C4A       | 14.69347340 | 42.25596910 | -3.38537278 | 0.1005                   | 0.0996                   |
| 1          | 11       | CMA       | 17.15676470 | 42.71666234 | -3.76677357 | -0.0290                  | -0.0367                  |
| 1          | 12       | CAA       | 14.78891363 | 45.45698887 | -4.66269829 | 0.0773                   | 0.0714                   |
| 1          | 13       | CBA       | 15.91253194 | 46.43214120 | -4.27135569 | -0.0073                  | -0.0039                  |
| 1          | 14       | CGA       | 16.87199144 | 46.68156859 | -5.41145272 | 0.0090                   | 0.0094                   |
| 1          | 15       | O1A       | 16.75934185 | 47.56051486 | -6.22818281 | -0.0006                  | -0.0009                  |
| 1          | 16       | O2A       | 17.87369424 | 45.78095802 | -5.42223067 | -0.0085                  | -0.0093                  |
| 1          | 17       | NB        | 12.87115822 | 39.96508859 | -2.69739738 | -0.0707                  | -0.0682                  |
| 1          | 18       | C1B       | 13.84819345 | 40.43299371 | -1.89471165 | 0.0554                   | 0.0520                   |
| 1          | 19       | C2B       | 13.89523528 | 39.66323008 | -0.66323422 | 0.0209                   | 0.0214                   |
| 1          | 20       | C3B       | 12.92360577 | 38.70886175 | -0.75906756 | 0.0102                   | 0.0123                   |
| 1          | 21       | C4B       | 12.25483947 | 38.91179712 | -2.04441746 | 0.1319                   | 0.1372                   |
| 1          | 22       | CMB       | 14.86870286 | 39.88784809 | 0.44780111  | -0.0230                  | -0.0246                  |
| 1          | 23       | CAB       | 12.61633631 | 37.68663679 | 0.24322192  | -0.0216                  | -0.0231                  |
| 1          | 24       | CBB       | 12.29179847 | 36.41585908 | 0.00293219  | 0.0218                   | 0.0231                   |

| <b>Pigment No</b> | <b>Atom No</b> | <b>Atom Name</b> | <b>Coordinates</b> |             |             | <b>Vacuum TrESP Charge</b> | <b>Solvent TrESP Charge</b> |
|-------------------|----------------|------------------|--------------------|-------------|-------------|----------------------------|-----------------------------|
| 1                 | 25             | NC               | 10.84980043        | 39.24645431 | -4.69528377 | 0.0020                     | 0.0020                      |
| 1                 | 26             | C1C              | 10.48560370        | 38.36055701 | -3.74060717 | 0.1389                     | 0.1403                      |
| 1                 | 27             | C2C              | 9.33903125         | 37.60223305 | -4.16539928 | -0.0324                    | -0.0243                     |
| 1                 | 28             | C3C              | 9.01331225         | 38.06064647 | -5.41840516 | 0.0569                     | 0.0525                      |
| 1                 | 29             | C4C              | 9.96363881         | 39.09775252 | -5.73987929 | -0.0892                    | -0.0810                     |
| 1                 | 30             | CMC              | 8.65581547         | 36.53892033 | -3.36247590 | -0.0134                    | -0.0182                     |
| 1                 | 31             | CAC              | 7.91237362         | 37.57569586 | -6.31562949 | -0.0282                    | -0.0286                     |
| 1                 | 32             | CBC              | 8.35975004         | 36.45423994 | -7.26062071 | 0.0152                     | 0.0160                      |
| 1                 | 33             | ND               | 11.78403841        | 41.33697265 | -6.35213516 | 0.0622                     | 0.0594                      |
| 1                 | 34             | C1D              | 10.81105227        | 40.90216857 | -7.24202530 | -0.0690                    | -0.0593                     |
| 1                 | 35             | C2D              | 10.85917086        | 41.68890921 | -8.45022191 | -0.0482                    | -0.0583                     |
| 1                 | 36             | C3D              | 11.89460583        | 42.58680478 | -8.24803837 | -0.0013                    | -0.0052                     |
| 1                 | 37             | C4D              | 12.41968718        | 42.32747289 | -6.96184876 | -0.1034                    | -0.1007                     |
| 1                 | 38             | CMD              | 9.98594185         | 41.54971393 | -9.65402226 | 0.0532                     | 0.0633                      |
| 1                 | 39             | CAD              | 12.65220327        | 43.68495358 | -8.84142588 | 0.0087                     | 0.0159                      |
| 1                 | 40             | OBD              | 12.53235957        | 44.22987038 | -9.91582889 | -0.0224                    | -0.0358                     |
| 1                 | 41             | CBD              | 13.73582082        | 44.09627308 | -7.77798119 | -0.0955                    | -0.1082                     |
| 1                 | 42             | CGD              | 15.14321840        | 43.94375987 | -8.31718965 | 0.0289                     | 0.0337                      |
| 1                 | 43             | O1D              | 16.06294433        | 44.68753825 | -8.06070335 | -0.0042                    | -0.0055                     |
| 1                 | 44             | O2D              | 15.27282358        | 42.84895990 | -9.07414446 | -0.0002                    | 0.0042                      |
| 1                 | 45             | CED              | 16.58362926        | 42.60323569 | -9.58430219 | 0.0009                     | -0.0076                     |
| 1                 | 46             | C1               | 18.76417192        | 45.87630622 | -6.54086449 | 0.0105                     | 0.0111                      |
| 1                 | 47             | H                | 15.46320839        | 41.75305990 | -1.49758020 | 0.0003                     | -0.0024                     |
| 1                 | 48             | H                | 10.75683550        | 37.46876657 | -1.82727062 | 0.0211                     | 0.0194                      |
| 1                 | 49             | H                | 9.20722262         | 39.58810756 | -7.65640656 | -0.0011                    | 0.0028                      |
| 1                 | 50             | H                | 17.88067536        | 43.51158470 | -3.96657301 | 0.0136                     | 0.0159                      |
| 1                 | 51             | H                | 17.19171241        | 42.00632871 | -4.59924265 | 0.0077                     | 0.0101                      |

| <b>Pigment No</b> | <b>Atom No</b> | <b>Atom Name</b> | <b>Coordinates</b> |             |              | <b>Vacuum TrESP Charge</b> | <b>Solvent TrESP Charge</b> |
|-------------------|----------------|------------------|--------------------|-------------|--------------|----------------------------|-----------------------------|
| 1                 | 52             | H                | 17.45829080        | 42.18445720 | -2.86003995  | -0.0015                    | 0.0031                      |
| 1                 | 53             | H                | 14.03976673        | 45.45091243 | -3.86263894  | -0.0168                    | -0.0156                     |
| 1                 | 54             | H                | 14.29232890        | 45.84615841 | -5.55618120  | -0.0176                    | -0.0164                     |
| 1                 | 55             | H                | 15.47176981        | 47.39624412 | -4.00836774  | -0.0048                    | -0.0056                     |
| 1                 | 56             | H                | 16.46881500        | 46.05902447 | -3.40636643  | -0.0055                    | -0.0062                     |
| 1                 | 57             | H                | 14.76313730        | 40.88952353 | 0.87981663   | 0.0151                     | 0.0173                      |
| 1                 | 58             | H                | 15.90257498        | 39.79651951 | 0.09618438   | 0.0135                     | 0.0149                      |
| 1                 | 59             | H                | 14.73350609        | 39.16000508 | 1.25063745   | 0.0081                     | 0.0096                      |
| 1                 | 60             | H                | 12.69659734        | 38.00810018 | 1.28046792   | 0.0063                     | 0.0072                      |
| 1                 | 61             | H                | 12.24198546        | 36.00998758 | -1.00228067  | 0.0007                     | -0.0002                     |
| 1                 | 62             | H                | 12.09025870        | 35.72928977 | 0.81870286   | 0.0047                     | 0.0061                      |
| 1                 | 63             | H                | 7.86395231         | 36.05325364 | -3.93767163  | 0.0046                     | 0.0054                      |
| 1                 | 64             | H                | 8.19960460         | 36.94974907 | -2.45454674  | 0.0028                     | 0.0049                      |
| 1                 | 65             | H                | 9.35508547         | 35.75712666 | -3.04646478  | 0.0022                     | 0.0047                      |
| 1                 | 66             | H                | 7.07355425         | 37.22322340 | -5.70590019  | 0.0064                     | 0.0076                      |
| 1                 | 67             | H                | 7.51614705         | 38.40990320 | -6.90482828  | 0.0095                     | 0.0088                      |
| 1                 | 68             | H                | 8.71636750         | 35.58837064 | -6.69436338  | -0.0042                    | -0.0041                     |
| 1                 | 69             | H                | 9.18069594         | 36.78602273 | -7.90353107  | -0.0007                    | -0.0014                     |
| 1                 | 70             | H                | 7.53576648         | 36.12542829 | -7.90178375  | 0.0012                     | 0.0012                      |
| 1                 | 71             | H                | 10.22361920        | 42.32709539 | -10.38284386 | -0.0147                    | -0.0182                     |
| 1                 | 72             | H                | 8.92559241         | 41.63447035 | -9.39292887  | -0.0264                    | -0.0344                     |
| 1                 | 73             | H                | 10.12484416        | 40.57732216 | -10.13964449 | -0.0237                    | -0.0270                     |
| 1                 | 74             | H                | 13.60717580        | 45.15610948 | -7.54276578  | 0.0271                     | 0.0279                      |
| 1                 | 75             | H                | 16.50148375        | 41.70002176 | -10.18671725 | -0.0001                    | 0.0015                      |
| 1                 | 76             | H                | 17.28885229        | 42.45451250 | -8.76364678  | -0.0052                    | -0.0031                     |
| 1                 | 77             | H                | 16.92001127        | 43.44354878 | -10.19440075 | -0.0021                    | -0.0012                     |
| 1                 | 78             | H                | 19.56103882        | 45.16016940 | -6.34242863  | -0.0026                    | -0.0023                     |

| <b>Pigment No</b> | <b>Atom No</b> | <b>Atom Name</b> | <b>Coordinates</b> |             |              | <b>Vacuum TrESP Charge</b> | <b>Solvent TrESP Charge</b> |
|-------------------|----------------|------------------|--------------------|-------------|--------------|----------------------------|-----------------------------|
| 1                 | 79             | H                | 19.16595062        | 46.88776840 | -6.62023266  | -0.0038                    | -0.0042                     |
| 1                 | 80             | H                | 18.22772841        | 45.61995251 | -7.45537076  | -0.0022                    | -0.0025                     |
| 1                 | 81             | H                | 16.06066437        | 44.04237204 | -5.66225713  | 0.0168                     | 0.0148                      |
| 1                 | 82             | H                | 15.75897804        | 44.01495140 | -2.78318128  | -0.0187                    | -0.0131                     |
| 2                 | 1              | MG               | 20.33200762        | 39.26504377 | -10.09126813 | 0.0024                     | 0.0022                      |
| 2                 | 2              | CHA              | 17.13598902        | 38.39744528 | -11.01223274 | 0.1130                     | 0.1015                      |
| 2                 | 3              | CHB              | 20.53515392        | 36.44366588 | -8.21124079  | -0.0395                    | -0.0262                     |
| 2                 | 4              | CHC              | 23.50439178        | 40.13976673 | -9.19821393  | -0.1692                    | -0.1719                     |
| 2                 | 5              | CHD              | 20.07931956        | 42.12143116 | -12.03726487 | 0.0776                     | 0.0591                      |
| 2                 | 6              | NA               | 19.02590979        | 37.67037485 | -9.68173250  | 0.0272                     | 0.0257                      |
| 2                 | 7              | C1A              | 17.76794445        | 37.48010894 | -10.21912642 | -0.1160                    | -0.1078                     |
| 2                 | 8              | C2A              | 17.24217326        | 36.10360363 | -9.87973499  | -0.0461                    | -0.0367                     |
| 2                 | 9              | C3A              | 18.14076168        | 35.70209666 | -8.69460761  | 0.0444                     | 0.0345                      |
| 2                 | 10             | C4A              | 19.33229422        | 36.63443302 | -8.86732471  | 0.0794                     | 0.0797                      |
| 2                 | 11             | CMA              | 17.47501471        | 35.92934163 | -7.33372152  | -0.0284                    | -0.0349                     |
| 2                 | 12             | CAA              | 17.39901248        | 35.16119234 | -11.09352836 | 0.0542                     | 0.0549                      |
| 2                 | 13             | CBA              | 16.46695194        | 33.94944816 | -11.02264080 | -0.0286                    | -0.0334                     |
| 2                 | 14             | CGA              | 15.04944083        | 34.37514934 | -11.33979230 | 0.0156                     | 0.0188                      |
| 2                 | 15             | O1A              | 14.73647929        | 34.99321493 | -12.33142570 | -0.0033                    | -0.0039                     |
| 2                 | 16             | O2A              | 14.17973131        | 33.99928989 | -10.39672769 | -0.0033                    | -0.0042                     |
| 2                 | 17             | NB               | 21.76511495        | 38.45660351 | -8.89190231  | -0.0824                    | -0.0840                     |
| 2                 | 18             | C1B              | 21.66413585        | 37.28671722 | -8.22427398  | 0.0600                     | 0.0598                      |
| 2                 | 19             | C2B              | 22.89286916        | 37.02546424 | -7.49515130  | 0.0246                     | 0.0260                      |
| 2                 | 20             | C3B              | 23.72154078        | 38.08767013 | -7.72262512  | 0.0181                     | 0.0183                      |
| 2                 | 21             | C4B              | 23.01473102        | 38.98570222 | -8.63314749  | 0.1328                     | 0.1422                      |
| 2                 | 22             | CMB              | 23.13276391        | 35.83118130 | -6.62848422  | -0.0454                    | -0.0494                     |
| 2                 | 23             | CAB              | 25.05521633        | 38.27797832 | -7.15089376  | -0.0365                    | -0.0380                     |

| <b>Pigment No</b> | <b>Atom No</b> | <b>Atom Name</b> | <b>Coordinates</b> |             |              | <b>Vacuum TrESP Charge</b> | <b>Solvent TrESP Charge</b> |
|-------------------|----------------|------------------|--------------------|-------------|--------------|----------------------------|-----------------------------|
| 2                 | 24             | CBB              | 25.56411002        | 39.43083199 | -6.71537005  | 0.0337                     | 0.0359                      |
| 2                 | 25             | NC               | 21.57405752        | 40.84621932 | -10.54947548 | -0.0158                    | -0.0174                     |
| 2                 | 26             | C1C              | 22.83656301        | 41.01962730 | -10.08733452 | 0.1583                     | 0.1619                      |
| 2                 | 27             | C2C              | 23.40112919        | 42.23208173 | -10.61766696 | -0.0464                    | -0.0379                     |
| 2                 | 28             | C3C              | 22.43678758        | 42.79543841 | -11.41803595 | 0.0561                     | 0.0519                      |
| 2                 | 29             | C4C              | 21.29372482        | 41.91881546 | -11.36581798 | -0.0938                    | -0.0854                     |
| 2                 | 30             | CMC              | 24.77357290        | 42.75099095 | -10.32009950 | 0.0093                     | 0.0030                      |
| 2                 | 31             | CAC              | 22.51404821        | 44.09190199 | -12.16863985 | -0.0304                    | -0.0298                     |
| 2                 | 32             | CBC              | 22.02717642        | 45.29258889 | -11.34757036 | 0.0129                     | 0.0134                      |
| 2                 | 33             | ND               | 18.92553445        | 40.13517839 | -11.24399086 | 0.0555                     | 0.0541                      |
| 2                 | 34             | C1D              | 18.95642500        | 41.30176716 | -12.00083384 | -0.0601                    | -0.0512                     |
| 2                 | 35             | C2D              | 17.70117737        | 41.46420410 | -12.70147013 | -0.0632                    | -0.0776                     |
| 2                 | 36             | C3D              | 16.94345726        | 40.36660123 | -12.33412928 | 0.0100                     | 0.0141                      |
| 2                 | 37             | C4D              | 17.73419728        | 39.59888290 | -11.45124707 | -0.0976                    | -0.0963                     |
| 2                 | 38             | CMD              | 17.31304237        | 42.58227292 | -13.61162756 | 0.0610                     | 0.0697                      |
| 2                 | 39             | CAD              | 15.67202146        | 39.66925617 | -12.52714622 | -0.0085                    | -0.0083                     |
| 2                 | 40             | OBD              | 14.72562116        | 39.95510855 | -13.22522371 | -0.0209                    | -0.0331                     |
| 2                 | 41             | CBD              | 15.73132134        | 38.38018053 | -11.62322535 | -0.0430                    | -0.0440                     |
| 2                 | 42             | CGD              | 14.68220542        | 38.43535555 | -10.53018636 | 0.0161                     | 0.0182                      |
| 2                 | 43             | O1D              | 14.08742341        | 37.47948519 | -10.08536455 | -0.0066                    | -0.0085                     |
| 2                 | 44             | O2D              | 14.52238494        | 39.67826786 | -10.06018732 | -0.0023                    | 0.0005                      |
| 2                 | 45             | CED              | 13.57783109        | 39.82064461 | -8.99885607  | 0.0046                     | -0.0002                     |
| 2                 | 46             | C1               | 12.82959977        | 34.43259948 | -10.60603318 | -0.0012                    | 0.0003                      |
| 2                 | 47             | H                | 20.61336489        | 35.55136407 | -7.59985584  | -0.0009                    | -0.0030                     |
| 2                 | 48             | H                | 24.52158618        | 40.40771998 | -8.93958889  | 0.0193                     | 0.0178                      |
| 2                 | 49             | H                | 20.00981373        | 43.01013962 | -12.65691586 | -0.0055                    | -0.0011                     |
| 2                 | 50             | H                | 16.59862762        | 35.28393044 | -7.21884953  | 0.0141                     | 0.0164                      |

| <b>Pigment No</b> | <b>Atom No</b> | <b>Atom Name</b> | <b>Coordinates</b> |             |              | <b>Vacuum TrESP Charge</b> | <b>Solvent TrESP Charge</b> |
|-------------------|----------------|------------------|--------------------|-------------|--------------|----------------------------|-----------------------------|
| 2                 | 51             | H                | 17.14416276        | 36.96837386 | -7.23587493  | 0.0092                     | 0.0104                      |
| 2                 | 52             | H                | 18.16943961        | 35.71819093 | -6.51523463  | 0.0009                     | 0.0048                      |
| 2                 | 53             | H                | 17.17603776        | 35.69735084 | -12.01918524 | -0.0098                    | -0.0119                     |
| 2                 | 54             | H                | 18.44270714        | 34.83419710 | -11.16058058 | -0.0142                    | -0.0126                     |
| 2                 | 55             | H                | 16.50495441        | 33.46106733 | -10.04575557 | 0.0018                     | 0.0029                      |
| 2                 | 56             | H                | 16.76092322        | 33.21452266 | -11.77947466 | 0.0007                     | 0.0015                      |
| 2                 | 57             | H                | 22.89539602        | 34.89983311 | -7.15284324  | 0.0195                     | 0.0220                      |
| 2                 | 58             | H                | 22.51139864        | 35.86165198 | -5.72547552  | 0.0186                     | 0.0205                      |
| 2                 | 59             | H                | 24.17380713        | 35.77509820 | -6.30235268  | 0.0153                     | 0.0176                      |
| 2                 | 60             | H                | 25.66027962        | 37.37822086 | -7.04912854  | 0.0102                     | 0.0113                      |
| 2                 | 61             | H                | 24.99801360        | 40.35614927 | -6.73905918  | -0.0030                    | -0.0044                     |
| 2                 | 62             | H                | 26.56373612        | 39.47754025 | -6.29549600  | 0.0028                     | 0.0039                      |
| 2                 | 63             | H                | 25.01945690        | 43.60369579 | -10.95738616 | -0.0013                    | 0.0000                      |
| 2                 | 64             | H                | 25.54058620        | 41.98658491 | -10.48453655 | -0.0037                    | -0.0008                     |
| 2                 | 65             | H                | 24.86719982        | 43.08334480 | -9.27955543  | -0.0032                    | -0.0005                     |
| 2                 | 66             | H                | 21.92815291        | 44.02175433 | -13.09185976 | 0.0111                     | 0.0099                      |
| 2                 | 67             | H                | 23.54651206        | 44.26968594 | -12.48816226 | 0.0081                     | 0.0089                      |
| 2                 | 68             | H                | 20.99792864        | 45.14239302 | -11.00807700 | 0.0002                     | 0.0002                      |
| 2                 | 69             | H                | 22.06041539        | 46.21207062 | -11.94084291 | 0.0015                     | 0.0015                      |
| 2                 | 70             | H                | 22.65039793        | 45.43686078 | -10.46016154 | -0.0033                    | -0.0032                     |
| 2                 | 71             | H                | 16.34910591        | 42.36918565 | -14.07793304 | -0.0144                    | -0.0175                     |
| 2                 | 72             | H                | 18.05263589        | 42.73770160 | -14.40448460 | -0.0270                    | -0.0339                     |
| 2                 | 73             | H                | 17.22111151        | 43.52752481 | -13.06432479 | -0.0251                    | -0.0281                     |
| 2                 | 74             | H                | 15.51436344        | 37.49105522 | -12.22252983 | 0.0143                     | 0.0138                      |
| 2                 | 75             | H                | 13.52162806        | 40.88895516 | -8.79572366  | -0.0006                    | 0.0002                      |
| 2                 | 76             | H                | 13.91730865        | 39.27984954 | -8.11232112  | -0.0059                    | -0.0045                     |
| 2                 | 77             | H                | 12.60337414        | 39.43338659 | -9.30083089  | -0.0023                    | -0.0020                     |

| <b>Pigment No</b> | <b>Atom No</b> | <b>Atom Name</b> | <b>Coordinates</b> |             |              | <b>Vacuum TrESP Charge</b> | <b>Solvent TrESP Charge</b> |
|-------------------|----------------|------------------|--------------------|-------------|--------------|----------------------------|-----------------------------|
| 2                 | 78             | H                | 12.25521386        | 34.00126698 | -9.78695009  | -0.0011                    | -0.0013                     |
| 2                 | 79             | H                | 12.45757288        | 34.07343239 | -11.56768031 | -0.0008                    | -0.0018                     |
| 2                 | 80             | H                | 12.78953302        | 35.52194304 | -10.58036796 | 0.0019                     | 0.0016                      |
| 2                 | 81             | H                | 16.18598224        | 36.14969620 | -9.59599637  | 0.0049                     | 0.0025                      |
| 2                 | 82             | H                | 18.45609717        | 34.65547460 | -8.76664522  | -0.0107                    | -0.0063                     |
| 3                 | 1              | MG               | 29.81352548        | 35.20703989 | 6.07986765   | -0.0058                    | 0.0041                      |
| 3                 | 2              | CHA              | 28.72672546        | 35.06551552 | 9.32335264   | 0.0909                     | -0.0794                     |
| 3                 | 3              | CHB              | 27.56950688        | 37.65868953 | 5.43086244   | -0.0414                    | 0.0297                      |
| 3                 | 4              | CHC              | 30.95414082        | 35.34653669 | 2.86700219   | -0.1733                    | 0.1803                      |
| 3                 | 5              | CHD              | 32.08549955        | 32.65785134 | 6.76690511   | 0.0800                     | -0.0607                     |
| 3                 | 6              | NA               | 28.40515851        | 36.24470298 | 7.23544276   | 0.0218                     | -0.0178                     |
| 3                 | 7              | C1A              | 28.12274096        | 36.03579741 | 8.57264433   | -0.1021                    | 0.0909                      |
| 3                 | 8              | C2A              | 27.09913333        | 37.03495146 | 9.07010239   | -0.0505                    | 0.0492                      |
| 3                 | 9              | C3A              | 26.54322192        | 37.62166737 | 7.75873651   | 0.0158                     | -0.0062                     |
| 3                 | 10             | C4A              | 27.56798854        | 37.17540710 | 6.72818574   | 0.0957                     | -0.0978                     |
| 3                 | 11             | CMA              | 25.14168594        | 37.10422722 | 7.41714014   | -0.0146                    | 0.0187                      |
| 3                 | 12             | CAA              | 27.75312441        | 38.10516957 | 9.96562266   | 0.0463                     | -0.0459                     |
| 3                 | 13             | CBA              | 26.72895821        | 39.02503641 | 10.64943567  | -0.0091                    | 0.0078                      |
| 3                 | 14             | CGA              | 25.98681891        | 38.28016677 | 11.73431673  | 0.0061                     | -0.0084                     |
| 3                 | 15             | O1A              | 26.43933805        | 38.03109933 | 12.82493792  | -0.0003                    | 0.0009                      |
| 3                 | 16             | O2A              | 24.76688686        | 37.88939831 | 11.32919540  | -0.0035                    | 0.0050                      |
| 3                 | 17             | NB               | 29.32135288        | 36.27499078 | 4.41925923   | -0.0697                    | 0.0725                      |
| 3                 | 18             | C1B              | 28.39625051        | 37.25837660 | 4.36595495   | 0.0472                     | -0.0469                     |
| 3                 | 19             | C2B              | 28.36458263        | 37.84032982 | 3.03536719   | 0.0303                     | -0.0309                     |
| 3                 | 20             | C3B              | 29.28579760        | 37.16601310 | 2.28673865   | 0.0118                     | -0.0132                     |
| 3                 | 21             | C4B              | 29.91004312        | 36.18512782 | 3.17305543   | 0.1319                     | -0.1443                     |
| 3                 | 22             | CMB              | 27.45067544        | 38.94568242 | 2.61403502   | -0.0414                    | 0.0441                      |



| <b>Pigment No</b> | <b>Atom No</b> | <b>Atom Name</b> | <b>Coordinates</b> |             |             | <b>Vacuum TrESP Charge</b> | <b>Solvent TrESP Charge</b> |
|-------------------|----------------|------------------|--------------------|-------------|-------------|----------------------------|-----------------------------|
| 3                 | 23             | CAB              | 29.58653668        | 37.40134169 | 0.87350333  | -0.0306                    | 0.0335                      |
| 3                 | 24             | CBB              | 29.83572069        | 36.46706567 | -0.04404028 | 0.0301                     | -0.0328                     |
| 3                 | 25             | NC               | 31.24782919        | 34.17029950 | 5.01023858  | -0.0119                    | 0.0175                      |
| 3                 | 26             | C1C              | 31.57801783        | 34.39689933 | 3.71570493  | 0.1542                     | -0.1638                     |
| 3                 | 27             | C2C              | 32.64651121        | 33.52285354 | 3.30788999  | -0.0330                    | 0.0281                      |
| 3                 | 28             | C3C              | 32.95724825        | 32.75071450 | 4.39956985  | 0.0518                     | -0.0477                     |
| 3                 | 29             | C4C              | 32.07896510        | 33.16909579 | 5.46430743  | -0.0917                    | 0.0818                      |
| 3                 | 30             | CMC              | 33.26185149        | 33.49065325 | 1.94341034  | -0.0155                    | 0.0190                      |
| 3                 | 31             | CAC              | 33.96596695        | 31.64343055 | 4.48089777  | -0.0213                    | 0.0185                      |
| 3                 | 32             | CBC              | 33.36111698        | 30.26770989 | 4.17299780  | 0.0140                     | -0.0125                     |
| 3                 | 33             | ND               | 30.35059315        | 34.08875627 | 7.67295197  | 0.0661                     | -0.0645                     |
| 3                 | 34             | C1D              | 31.27895953        | 33.06518759 | 7.82482555  | -0.0769                    | 0.0669                      |
| 3                 | 35             | C2D              | 31.23439735        | 32.55437261 | 9.17402793  | -0.0446                    | 0.0531                      |
| 3                 | 36             | C3D              | 30.24946082        | 33.29821479 | 9.80172195  | -0.0247                    | 0.0310                      |
| 3                 | 37             | C4D              | 29.74781154        | 34.20893619 | 8.84530290  | -0.0840                    | 0.0813                      |
| 3                 | 38             | CMD              | 32.06760971        | 31.45853226 | 9.75297834  | 0.0718                     | -0.0824                     |
| 3                 | 39             | CAD              | 29.52730777        | 33.50542859 | 11.05395643 | 0.0024                     | -0.0077                     |
| 3                 | 40             | OBD              | 29.65315788        | 32.96648980 | 12.13053736 | -0.0235                    | 0.0371                      |
| 3                 | 41             | CBD              | 28.46635532        | 34.63255727 | 10.76934505 | -0.0114                    | 0.0109                      |
| 3                 | 42             | CGD              | 27.05588589        | 34.10019853 | 10.92533757 | 0.0001                     | -0.0010                     |
| 3                 | 43             | O1D              | 26.11965688        | 34.73155311 | 11.35930544 | -0.0030                    | 0.0048                      |
| 3                 | 44             | O2D              | 26.94599248        | 32.84803324 | 10.46727434 | 0.0055                     | -0.0097                     |
| 3                 | 45             | CED              | 25.64112510        | 32.27207840 | 10.54295098 | -0.0017                    | 0.0094                      |
| 3                 | 46             | C1               | 24.03826183        | 37.09676388 | 12.27525233 | -0.0002                    | -0.0010                     |
| 3                 | 47             | H                | 26.84458265        | 38.43412907 | 5.20799840  | 0.0008                     | 0.0011                      |
| 3                 | 48             | H                | 31.35577169        | 35.42063428 | 1.86352567  | 0.0218                     | -0.0208                     |
| 3                 | 49             | H                | 32.79275116        | 31.85982125 | 6.97230802  | -0.0096                    | 0.0057                      |

| <b>Pigment No</b> | <b>Atom No</b> | <b>Atom Name</b> | <b>Coordinates</b> |             |             | <b>Vacuum TrESP Charge</b> | <b>Solvent TrESP Charge</b> |
|-------------------|----------------|------------------|--------------------|-------------|-------------|----------------------------|-----------------------------|
| 3                 | 50             | H                | 24.79753543        | 37.49539441 | 6.45565075  | -0.0016                    | -0.0017                     |
| 3                 | 51             | H                | 24.43051857        | 37.40499749 | 8.19231690  | 0.0118                     | -0.0133                     |
| 3                 | 52             | H                | 25.13602940        | 36.01085310 | 7.35722384  | 0.0074                     | -0.0085                     |
| 3                 | 53             | H                | 28.43528054        | 38.71003086 | 9.35720663  | -0.0130                    | 0.0119                      |
| 3                 | 54             | H                | 28.36000648        | 37.63148318 | 10.74288819 | -0.0059                    | 0.0068                      |
| 3                 | 55             | H                | 26.01717853        | 39.42690786 | 9.92435161  | -0.0022                    | 0.0025                      |
| 3                 | 56             | H                | 27.24941691        | 39.85962629 | 11.12588705 | -0.0037                    | 0.0048                      |
| 3                 | 57             | H                | 27.62869712        | 39.24196756 | 1.57800714  | 0.0134                     | -0.0153                     |
| 3                 | 58             | H                | 27.57835135        | 39.83285498 | 3.24403034  | 0.0185                     | -0.0207                     |
| 3                 | 59             | H                | 26.39954323        | 38.64462202 | 2.69084614  | 0.0179                     | -0.0195                     |
| 3                 | 60             | H                | 29.56883996        | 38.44319206 | 0.55771227  | 0.0082                     | -0.0093                     |
| 3                 | 61             | H                | 29.82122686        | 35.40811437 | 0.19231662  | -0.0016                    | 0.0031                      |
| 3                 | 62             | H                | 30.03881822        | 36.73635996 | -1.07543019 | 0.0033                     | -0.0046                     |
| 3                 | 63             | H                | 33.75733196        | 34.43671500 | 1.69747316  | 0.0023                     | -0.0044                     |
| 3                 | 64             | H                | 32.51030220        | 33.30940902 | 1.16653074  | 0.0017                     | -0.0038                     |
| 3                 | 65             | H                | 34.00879253        | 32.69784459 | 1.86151308  | 0.0059                     | -0.0066                     |
| 3                 | 66             | H                | 34.78706176        | 31.84049334 | 3.78338927  | 0.0039                     | -0.0043                     |
| 3                 | 67             | H                | 34.42240563        | 31.62555083 | 5.47680379  | 0.0093                     | -0.0076                     |
| 3                 | 68             | H                | 32.95971496        | 30.23833135 | 3.15537111  | -0.0044                    | 0.0040                      |
| 3                 | 69             | H                | 32.53860282        | 30.04091812 | 4.85788977  | 0.0002                     | -0.0003                     |
| 3                 | 70             | H                | 34.11176413        | 29.47649400 | 4.26529307  | 0.0008                     | -0.0013                     |
| 3                 | 71             | H                | 31.97285078        | 30.53365581 | 9.17375616  | -0.0294                    | 0.0336                      |
| 3                 | 72             | H                | 31.75801931        | 31.25398060 | 10.77962833 | -0.0182                    | 0.0214                      |
| 3                 | 73             | H                | 33.13019016        | 31.72628322 | 9.76538288  | -0.0289                    | 0.0364                      |
| 3                 | 74             | H                | 28.58176122        | 35.43588415 | 11.50200745 | 0.0015                     | 0.0003                      |
| 3                 | 75             | H                | 25.75282317        | 31.24616163 | 10.19584840 | 0.0001                     | -0.0016                     |
| 3                 | 76             | H                | 24.94487267        | 32.81891957 | 9.90286034  | -0.0040                    | 0.0021                      |

| <b>Pigment No</b> | <b>Atom No</b> | <b>Atom Name</b> | <b>Coordinates</b> |             |             | <b>Vacuum TrESP Charge</b> | <b>Solvent TrESP Charge</b> |
|-------------------|----------------|------------------|--------------------|-------------|-------------|----------------------------|-----------------------------|
| 3                 | 77             | H                | 25.27455633        | 32.29447825 | 11.57058902 | -0.0010                    | 0.0001                      |
| 3                 | 78             | H                | 23.08497329        | 36.87601114 | 11.79603104 | -0.0008                    | 0.0006                      |
| 3                 | 79             | H                | 23.88130714        | 37.65832255 | 13.19833323 | -0.0009                    | 0.0016                      |
| 3                 | 80             | H                | 24.58591484        | 36.17889724 | 12.48744293 | 0.0015                     | -0.0011                     |
| 3                 | 81             | H                | 26.31639799        | 36.53128694 | 9.64365161  | 0.0098                     | -0.0103                     |
| 3                 | 82             | H                | 26.50968204        | 38.71615231 | 7.79670551  | -0.0027                    | -0.0023                     |
| 4                 | 1              | MG               | 21.85173606        | 30.00444529 | 8.46000170  | -0.0072                    | -0.0079                     |
| 4                 | 2              | CHA              | 25.03054334        | 28.67455743 | 8.40759250  | -0.1225                    | -0.1207                     |
| 4                 | 3              | CHB              | 21.72021982        | 29.77520846 | 5.08694655  | 0.0289                     | 0.0191                      |
| 4                 | 4              | CHC              | 18.70270540        | 31.27101550 | 8.55468944  | 0.1824                     | 0.1863                      |
| 4                 | 5              | CHD              | 22.09377492        | 30.32063775 | 11.91479948 | -0.0940                    | -0.0723                     |
| 4                 | 6              | NA               | 23.17825639        | 29.28113502 | 6.98911059  | -0.0168                    | -0.0147                     |
| 4                 | 7              | C1A              | 24.42930056        | 28.72979884 | 7.18144605  | 0.1011                     | 0.0970                      |
| 4                 | 8              | C2A              | 24.97641842        | 28.17237974 | 5.88481734  | 0.0988                     | 0.0915                      |
| 4                 | 9              | C3A              | 24.07739014        | 28.85336568 | 4.83419232  | -0.0550                    | -0.0448                     |
| 4                 | 10             | C4A              | 22.89716561        | 29.32964127 | 5.66731821  | -0.0808                    | -0.0831                     |
| 4                 | 11             | CMA              | 24.78068444        | 30.01232791 | 4.12210336  | 0.0189                     | 0.0227                      |
| 4                 | 12             | CAA              | 24.85776866        | 26.63566815 | 5.86798258  | -0.0812                    | -0.0820                     |
| 4                 | 13             | CBA              | 25.50924641        | 25.97502728 | 4.64291307  | 0.0407                     | 0.0404                      |
| 4                 | 14             | CGA              | 27.01107353        | 26.13081818 | 4.67859451  | -0.0190                    | -0.0207                     |
| 4                 | 15             | O1A              | 27.76172625        | 25.40671541 | 5.28460780  | 0.0018                     | 0.0023                      |
| 4                 | 16             | O2A              | 27.41879903        | 27.20564608 | 3.97968150  | 0.0088                     | 0.0099                      |
| 4                 | 17             | NB               | 20.42201715        | 30.38538063 | 7.06662855  | 0.0802                     | 0.0838                      |
| 4                 | 18             | C1B              | 20.56714535        | 30.25998890 | 5.73092644  | -0.0517                    | -0.0535                     |
| 4                 | 19             | C2B              | 19.35547609        | 30.69816222 | 5.05872865  | -0.0132                    | -0.0150                     |
| 4                 | 20             | C3B              | 18.47423785        | 31.06914503 | 6.03528700  | -0.0187                    | -0.0185                     |
| 4                 | 21             | C4B              | 19.16524647        | 30.90142011 | 7.31295611  | -0.1416                    | -0.1528                     |

| <b>Pigment No</b> | <b>Atom No</b> | <b>Atom Name</b> | <b>Coordinates</b> |             |             | <b>Vacuum TrESP Charge</b> | <b>Solvent TrESP Charge</b> |
|-------------------|----------------|------------------|--------------------|-------------|-------------|----------------------------|-----------------------------|
| 4                 | 22             | CMB              | 19.14931608        | 30.69052178 | 3.57860085  | 0.0269                     | 0.0304                      |
| 4                 | 23             | CAB              | 17.10777868        | 31.55062042 | 5.82861842  | 0.0289                     | 0.0307                      |
| 4                 | 24             | CBB              | 16.05063175        | 31.26157310 | 6.58794470  | -0.0269                    | -0.0298                     |
| 4                 | 25             | NC               | 20.61837301        | 30.66730433 | 9.97207104  | 0.0275                     | 0.0316                      |
| 4                 | 26             | C1C              | 19.37049794        | 31.16881442 | 9.80258776  | -0.1668                    | -0.1736                     |
| 4                 | 27             | C2C              | 18.81769808        | 31.58000739 | 11.06601831 | 0.0363                     | 0.0291                      |
| 4                 | 28             | C3C              | 19.76992035        | 31.30464377 | 12.01707765 | -0.0516                    | -0.0467                     |
| 4                 | 29             | C4C              | 20.89642359        | 30.73663484 | 11.31932238 | 0.0902                     | 0.0808                      |
| 4                 | 30             | CMC              | 17.46662104        | 32.19641112 | 11.25578532 | 0.0158                     | 0.0230                      |
| 4                 | 31             | CAC              | 19.70529662        | 31.58576451 | 13.48898420 | 0.0209                     | 0.0185                      |
| 4                 | 32             | CBC              | 20.36428524        | 32.91668892 | 13.87367823 | -0.0153                    | -0.0148                     |
| 4                 | 33             | ND               | 23.24754483        | 29.65301315 | 9.88592184  | -0.0588                    | -0.0571                     |
| 4                 | 34             | C1D              | 23.21141964        | 29.80195061 | 11.26861195 | 0.0804                     | 0.0666                      |
| 4                 | 35             | C2D              | 24.44830716        | 29.33332339 | 11.84771060 | 0.0606                     | 0.0760                      |
| 4                 | 36             | C3D              | 25.20357243        | 28.90296491 | 10.77070219 | -0.0031                    | -0.0023                     |
| 4                 | 37             | C4D              | 24.42731224        | 29.11784544 | 9.60963374  | 0.0917                     | 0.0928                      |
| 4                 | 38             | CMD              | 24.82018384        | 29.31399386 | 13.29415845 | -0.0803                    | -0.0973                     |
| 4                 | 39             | CAD              | 26.46302065        | 28.28040026 | 10.37161362 | -0.0024                    | -0.0099                     |
| 4                 | 40             | OBD              | 27.39961303        | 27.90403687 | 11.03982978 | 0.0220                     | 0.0355                      |
| 4                 | 41             | CBD              | 26.40901256        | 28.14140822 | 8.80430215  | 0.0784                     | 0.0927                      |
| 4                 | 42             | CGD              | 27.52481169        | 28.92456942 | 8.14332112  | -0.0254                    | -0.0317                     |
| 4                 | 43             | O1D              | 28.14243053        | 28.56370392 | 7.16805267  | 0.0054                     | 0.0077                      |
| 4                 | 44             | O2D              | 27.71965701        | 30.10570388 | 8.74144172  | 0.0008                     | -0.0013                     |
| 4                 | 45             | CED              | 28.73921984        | 30.92771076 | 8.17164249  | -0.0050                    | -0.0007                     |
| 4                 | 46             | C1               | 28.82171843        | 27.48845800 | 4.06897846  | -0.0075                    | -0.0085                     |
| 4                 | 47             | H                | 21.68774225        | 29.74458728 | 4.00283117  | 0.0021                     | 0.0035                      |
| 4                 | 48             | H                | 17.71418859        | 31.71411718 | 8.58423214  | -0.0201                    | -0.0185                     |

| <b>Pigment No</b> | <b>Atom No</b> | <b>Atom Name</b> | <b>Coordinates</b> |             |             | <b>Vacuum TrESP Charge</b> | <b>Solvent TrESP Charge</b> |
|-------------------|----------------|------------------|--------------------|-------------|-------------|----------------------------|-----------------------------|
| 4                 | 49             | H                | 22.15254902        | 30.41205634 | 12.99540576 | 0.0093                     | 0.0041                      |
| 4                 | 50             | H                | 24.11601195        | 30.51052744 | 3.40997931  | 0.0033                     | 0.0003                      |
| 4                 | 51             | H                | 25.65341587        | 29.63793941 | 3.57841207  | -0.0126                    | -0.0139                     |
| 4                 | 52             | H                | 25.12198477        | 30.76112246 | 4.84404084  | -0.0090                    | -0.0103                     |
| 4                 | 53             | H                | 25.31723536        | 26.21749497 | 6.76906781  | 0.0147                     | 0.0163                      |
| 4                 | 54             | H                | 23.79672440        | 26.36182215 | 5.89980186  | 0.0150                     | 0.0143                      |
| 4                 | 55             | H                | 25.29580339        | 24.90366163 | 4.65640250  | -0.0021                    | -0.0016                     |
| 4                 | 56             | H                | 25.11395811        | 26.39647556 | 3.71475725  | -0.0064                    | -0.0061                     |
| 4                 | 57             | H                | 19.95386719        | 31.22265721 | 3.05960535  | -0.0155                    | -0.0178                     |
| 4                 | 58             | H                | 18.20445724        | 31.16543070 | 3.30444949  | -0.0103                    | -0.0121                     |
| 4                 | 59             | H                | 19.12804769        | 29.66964706 | 3.17996187  | -0.0151                    | -0.0172                     |
| 4                 | 60             | H                | 16.95621704        | 32.17643554 | 4.95063223  | -0.0079                    | -0.0090                     |
| 4                 | 61             | H                | 16.12210116        | 30.60281717 | 7.44713965  | 0.0002                     | 0.0019                      |
| 4                 | 62             | H                | 15.06804189        | 31.65801055 | 6.35387584  | -0.0039                    | -0.0048                     |
| 4                 | 63             | H                | 16.67358171        | 31.57651984 | 10.82319531 | -0.0026                    | -0.0059                     |
| 4                 | 64             | H                | 17.40131832        | 33.18208974 | 10.78144643 | -0.0031                    | -0.0059                     |
| 4                 | 65             | H                | 17.23380488        | 32.32906595 | 12.31526845 | -0.0052                    | -0.0067                     |
| 4                 | 66             | H                | 20.17928919        | 30.77071541 | 14.04770360 | -0.0070                    | -0.0053                     |
| 4                 | 67             | H                | 18.65925290        | 31.59856047 | 13.81217845 | -0.0043                    | -0.0049                     |
| 4                 | 68             | H                | 21.42634827        | 32.91915515 | 13.61110215 | 0.0017                     | 0.0017                      |
| 4                 | 69             | H                | 20.27705148        | 33.10140205 | 14.94911548 | -0.0011                    | -0.0011                     |
| 4                 | 70             | H                | 19.89171871        | 33.74991914 | 13.34501774 | 0.0046                     | 0.0043                      |
| 4                 | 71             | H                | 25.80361831        | 28.85773872 | 13.42112612 | 0.0205                     | 0.0255                      |
| 4                 | 72             | H                | 24.09758587        | 28.74437805 | 13.88848408 | 0.0318                     | 0.0412                      |
| 4                 | 73             | H                | 24.85697808        | 30.32656322 | 13.71134392 | 0.0309                     | 0.0363                      |
| 4                 | 74             | H                | 26.56613510        | 27.09222935 | 8.53837367  | -0.0238                    | -0.0257                     |
| 4                 | 75             | H                | 28.69063419        | 31.87358112 | 8.70869893  | 0.0016                     | 0.0007                      |

| Pigment No | Atom No | Atom Name | Coordinates |             |            | Vacuum TrESP Charge | Solvent TrESP Charge |
|------------|---------|-----------|-------------|-------------|------------|---------------------|----------------------|
| 4          | 76      | H         | 28.55800721 | 31.07724932 | 7.10546381 | 0.0060              | 0.0050               |
| 4          | 77      | H         | 29.71804686 | 30.46234465 | 8.30483875 | 0.0027              | 0.0028               |
| 4          | 78      | H         | 29.40389912 | 26.61213048 | 3.77834755 | 0.0032              | 0.0038               |
| 4          | 79      | H         | 29.07247054 | 27.77581286 | 5.09074777 | 0.0013              | 0.0017               |
| 4          | 80      | H         | 28.99860112 | 28.31260512 | 3.37847877 | 0.0018              | 0.0015               |
| 4          | 81      | H         | 26.02545398 | 28.44558554 | 5.75007116 | -0.0163             | -0.0144              |
| 4          | 82      | H         | 23.73421498 | 28.13614815 | 4.08155523 | 0.0129              | 0.0081               |

Table S2: Cartesian atomic coordinates and TrESP charges of the four Chl *a* chromophores in WSCP after geometry optimization of each individual pigment in vacuum with DFT using the CAM-B3LYP XC-functional and a 6-31-G\* basis set, as described in the Computational Details section in the main text. The atom numbers are related to the structure of Chl *a* in Fig. S2. The attachments to this document include the above cartesian atomic coordinates in the file ***table\_s2\_coordinates.xyz*** as well as the two sets of TrESP charges in the file ***table\_s2\_charges.xyz***.

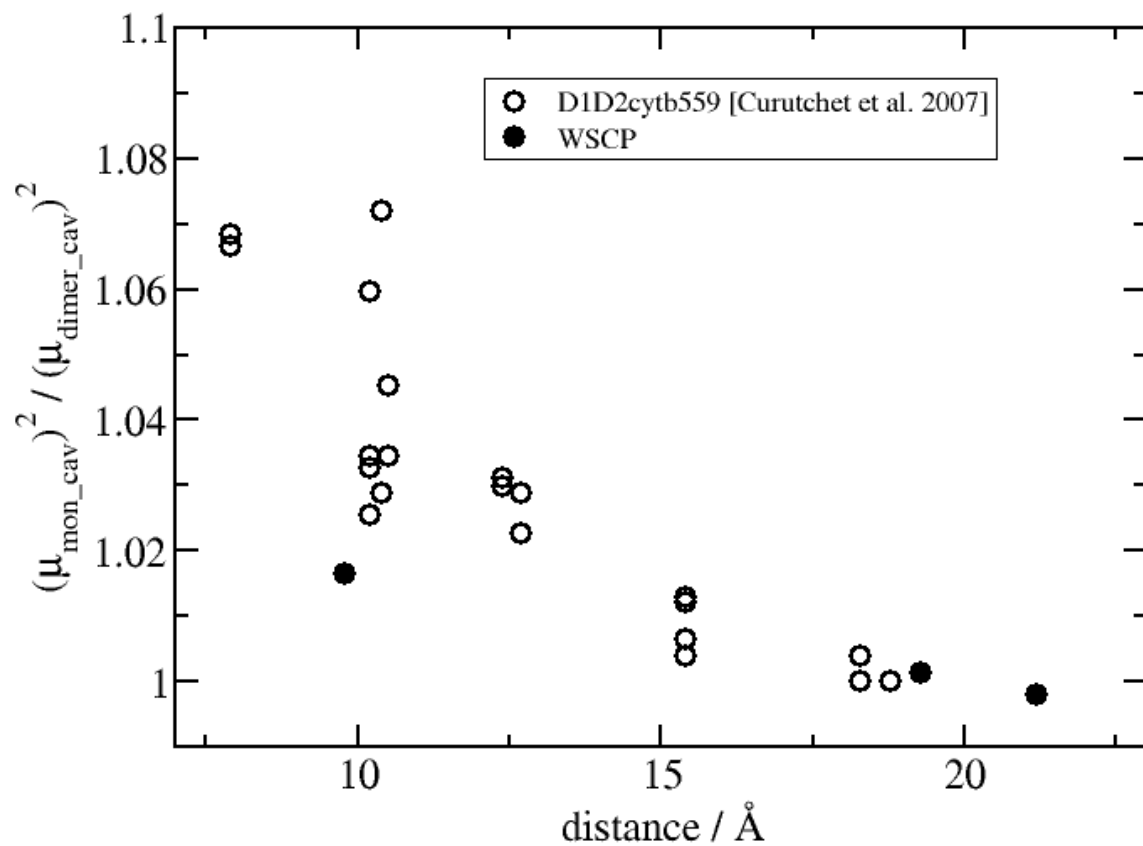

Figure S1: Ratio between dipole strengths obtained with TDDFT/PCM calculations for different Chl  $a$  pigments by taking into account a single pigment cavity or that of a dimer as a function of the inter-pigment distance in the dimer in D1D2cytb559 complexes (open circles, from the supporting information of ref [36]) of the main text and in WSCP (solid circles, present work).

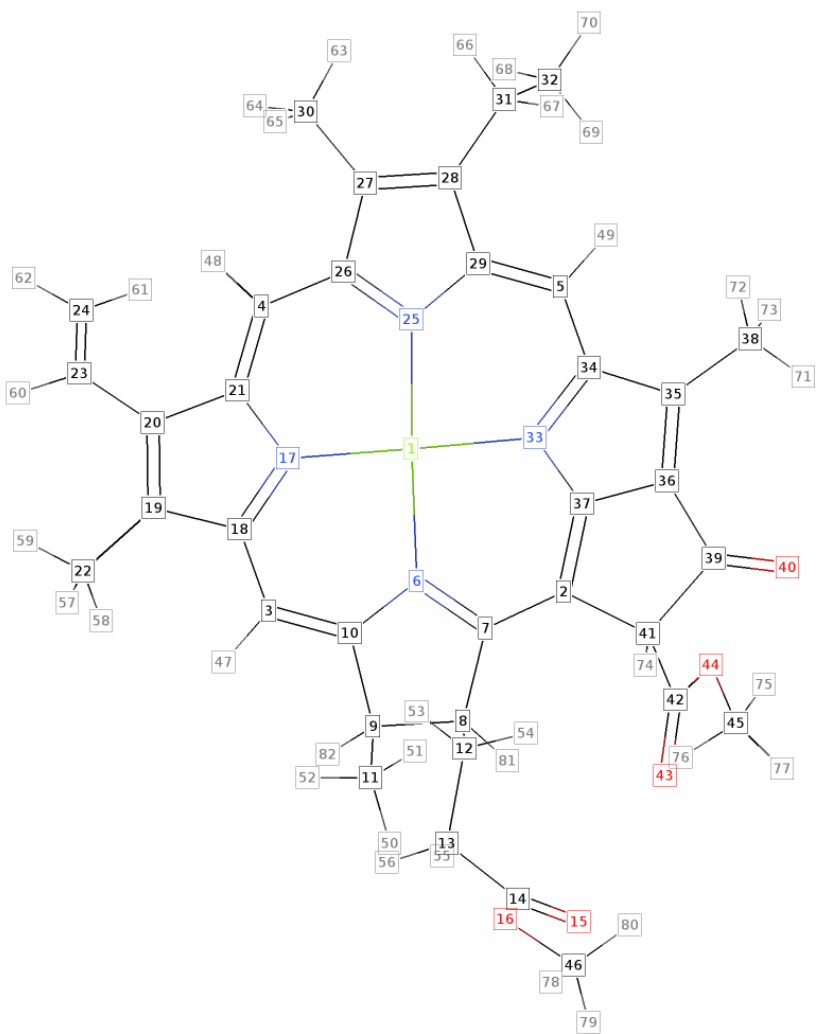

Jmol

Figure S2: Numbering scheme used for the atomic coordinates of Chl *a* in Tables S2, S3 and S16.



## Effect of geometry optimization on FMO1-FRET and FMO1-FRET-PCM1 calculations

| Pigment No | Atom No | Atom Name | Coordinates |             |             |
|------------|---------|-----------|-------------|-------------|-------------|
|            |         |           | X (Å)       | Y (Å)       | Z (Å)       |
| 1          | 1       | MG        | 12.32620626 | 40.67563648 | -4.52304068 |
| 1          | 2       | CHA       | 13.43664896 | 43.22824002 | -6.54180337 |
| 1          | 3       | CHB       | 14.71201195 | 41.48439021 | -2.23255654 |
| 1          | 4       | CHC       | 11.16362008 | 38.21073663 | -2.50432382 |
| 1          | 5       | CHD       | 9.93524733  | 39.87506929 | -6.90308155 |
| 1          | 6       | NA        | 13.82715323 | 42.16734484 | -4.42050006 |
| 1          | 7       | C1A       | 14.11805793 | 43.13838268 | -5.35917175 |
| 1          | 8       | C2A       | 15.25090686 | 44.03453816 | -4.89467245 |
| 1          | 9       | C3A       | 15.75312429 | 43.31624279 | -3.62715289 |
| 1          | 10      | C4A       | 14.69884609 | 42.24927484 | -3.38898877 |
| 1          | 11      | CMA       | 17.15547035 | 42.72045239 | -3.78765642 |
| 1          | 12      | CAA       | 14.78375853 | 45.47429877 | -4.62072806 |
| 1          | 13      | CBA       | 15.91789039 | 46.44159246 | -4.24047396 |
| 1          | 14      | CGA       | 16.86288390 | 46.69414583 | -5.39240511 |
| 1          | 15      | O1A       | 16.75535972 | 47.58873858 | -6.19227926 |
| 1          | 16      | O2A       | 17.84639183 | 45.77427068 | -5.43285549 |
| 1          | 17      | NB        | 12.87115822 | 39.96508859 | -2.69739738 |
| 1          | 18      | C1B       | 13.85721110 | 40.42341616 | -1.89972076 |
| 1          | 19      | C2B       | 13.90977727 | 39.64684522 | -0.67260681 |
| 1          | 20      | C3B       | 12.93415083 | 38.69651513 | -0.76710769 |
| 1          | 21      | C4B       | 12.25828771 | 38.90792165 | -2.04733758 |
| 1          | 22      | CMB       | 14.89080025 | 39.86032030 | 0.43400674  |
| 1          | 23      | CAB       | 12.62907576 | 37.66990036 | 0.23171174  |
| 1          | 24      | CBB       | 12.30285709 | 36.40050874 | -0.01364315 |
| 1          | 25      | NC        | 10.84980043 | 39.24645431 | -4.69528377 |
| 1          | 26      | C1C       | 10.48820021 | 38.35737300 | -3.74258600 |
| 1          | 27      | C2C       | 9.33924243  | 37.60121551 | -4.16576890 |
| 1          | 28      | C3C       | 9.00725861  | 38.06634499 | -5.41437562 |

| <b>Pigment No</b> | <b>Atom No</b> | <b>Atom Name</b> | <b>Coordinates</b> |             |             |
|-------------------|----------------|------------------|--------------------|-------------|-------------|
| 1                 | 29             | C4C              | 9.95670386         | 39.10488016 | -5.73558852 |
| 1                 | 30             | CMC              | 8.65711708         | 36.53597992 | -3.36449423 |
| 1                 | 31             | CAC              | 7.89976130         | 37.58920906 | -6.30773618 |
| 1                 | 32             | CBC              | 8.33922258         | 36.47710441 | -7.26716702 |
| 1                 | 33             | ND               | 11.78403841        | 41.33697265 | -6.35213516 |
| 1                 | 34             | C1D              | 10.77758421        | 40.93601875 | -7.22102912 |
| 1                 | 35             | C2D              | 10.76632468        | 41.78317875 | -8.38918604 |
| 1                 | 36             | C3D              | 11.79208481        | 42.69114376 | -8.17922347 |
| 1                 | 37             | C4D              | 12.37083387        | 42.37729188 | -6.92875261 |
| 1                 | 38             | CMD              | 9.85136181         | 41.68809148 | -9.56647314 |
| 1                 | 39             | CAD              | 12.51906543        | 43.82323847 | -8.75063966 |
| 1                 | 40             | OBD              | 12.35318217        | 44.41249817 | -9.79417048 |
| 1                 | 41             | CBD              | 13.63891056        | 44.19613322 | -7.71028424 |
| 1                 | 42             | CGD              | 15.03247948        | 44.04933753 | -8.28705754 |
| 1                 | 43             | O1D              | 15.95131275        | 44.80430690 | -8.06382872 |
| 1                 | 44             | O2D              | 15.14789851        | 42.93629810 | -9.01686311 |
| 1                 | 45             | CED              | 16.45235449        | 42.64508552 | -9.52877877 |
| 1                 | 46             | C1               | 18.72364925        | 45.86741814 | -6.56214868 |
| 1                 | 47             | H                | 15.48029002        | 41.73487033 | -1.50887341 |
| 1                 | 48             | H                | 10.76389856        | 37.46027492 | -1.83276102 |
| 1                 | 49             | H                | 9.16520081         | 39.62974366 | -7.62804234 |
| 1                 | 50             | H                | 17.87631827        | 43.51788055 | -3.98721821 |
| 1                 | 51             | H                | 17.18297444        | 42.01740252 | -4.62665335 |
| 1                 | 52             | H                | 17.46720814        | 42.17993606 | -2.88915287 |
| 1                 | 53             | H                | 14.04944540        | 45.46244065 | -3.80692230 |
| 1                 | 54             | H                | 14.27192336        | 45.87602209 | -5.49951063 |
| 1                 | 55             | H                | 15.48571261        | 47.40569209 | -3.96382093 |
| 1                 | 56             | H                | 16.48512078        | 46.06016304 | -3.38596746 |
| 1                 | 57             | H                | 14.79104860        | 40.85887489 | 0.87428337  |
| 1                 | 58             | H                | 15.92220934        | 39.76738135 | 0.07579896  |
| 1                 | 59             | H                | 14.75717921        | 39.12677726 | 1.23203500  |

| <b>Pigment No</b> | <b>Atom No</b> | <b>Atom Name</b> | <b>Coordinates</b> |             |              |
|-------------------|----------------|------------------|--------------------|-------------|--------------|
| 1                 | 60             | H                | 12.71077212        | 37.98681217 | 1.27019879   |
| 1                 | 61             | H                | 12.24999566        | 35.99947468 | -1.02066819  |
| 1                 | 62             | H                | 12.10142413        | 35.71046230 | 0.79924017   |
| 1                 | 63             | H                | 7.86567561         | 36.05104767 | -3.94093471  |
| 1                 | 64             | H                | 8.19996266         | 36.94504713 | -2.45627394  |
| 1                 | 65             | H                | 9.35670718         | 35.75404381 | -3.04981195  |
| 1                 | 66             | H                | 7.06519052         | 37.23196557 | -5.69504153  |
| 1                 | 67             | H                | 7.49921747         | 38.42907719 | -6.88611373  |
| 1                 | 68             | H                | 8.69802825         | 35.60464730 | -6.71252915  |
| 1                 | 69             | H                | 9.15576647         | 36.81420182 | -7.91284735  |
| 1                 | 70             | H                | 7.50998969         | 36.15677415 | -7.90584090  |
| 1                 | 71             | H                | 10.09080623        | 42.46776331 | -10.29214160 |
| 1                 | 72             | H                | 8.80309552         | 41.80482305 | -9.27060844  |
| 1                 | 73             | H                | 9.94264392         | 40.71847347 | -10.06789578 |
| 1                 | 74             | H                | 13.52163094        | 45.24744483 | -7.43668568  |
| 1                 | 75             | H                | 16.34341514        | 41.72165672 | -10.09228894 |
| 1                 | 76             | H                | 17.15846948        | 42.51693734 | -8.70484275  |
| 1                 | 77             | H                | 16.79877650        | 43.45677667 | -10.17051385 |
| 1                 | 78             | H                | 19.51546667        | 45.14174952 | -6.37775080  |
| 1                 | 79             | H                | 19.13506896        | 46.87503670 | -6.63978057  |
| 1                 | 80             | H                | 18.17326591        | 45.62177412 | -7.47127654  |
| 1                 | 81             | H                | 16.03412392        | 44.06448537 | -5.65543184  |
| 1                 | 82             | H                | 15.76544427        | 44.00262201 | -2.77242325  |
| 2                 | 1              | MG               | 20.33129563        | 39.26531711 | -10.09069422 |
| 2                 | 2              | CHA              | 17.17049046        | 38.35258108 | -11.07687788 |
| 2                 | 3              | CHB              | 20.51989122        | 36.46281849 | -8.18007656  |
| 2                 | 4              | CHC              | 23.51113955        | 40.12753432 | -9.21089713  |
| 2                 | 5              | CHD              | 20.08709007        | 42.11527668 | -12.04822350 |
| 2                 | 6              | NA               | 19.02590979        | 37.67037485 | -9.68173250  |
| 2                 | 7              | C1A              | 17.78481803        | 37.45799823 | -10.24784584 |
| 2                 | 8              | C2A              | 17.25776637        | 36.08643150 | -9.88938075  |

| <b>Pigment No</b> | <b>Atom No</b> | <b>Atom Name</b> | <b>Coordinates</b> |             |              |
|-------------------|----------------|------------------|--------------------|-------------|--------------|
| 2                 | 9              | C3A              | 18.12549539        | 35.72328507 | -8.66920987  |
| 2                 | 10             | C4A              | 19.32112325        | 36.64926193 | -8.84518167  |
| 2                 | 11             | CMA              | 17.42667097        | 35.99837683 | -7.33378231  |
| 2                 | 12             | CAA              | 17.45488799        | 35.11009667 | -11.06938000 |
| 2                 | 13             | CBA              | 16.53644619        | 33.88851439 | -10.98420800 |
| 2                 | 14             | CGA              | 15.12127522        | 34.28970309 | -11.34105202 |
| 2                 | 15             | O1A              | 14.82325514        | 34.86131006 | -12.36431201 |
| 2                 | 16             | O2A              | 14.23859247        | 33.95514925 | -10.39435018 |
| 2                 | 17             | NB               | 21.76511495        | 38.45660351 | -8.89190231  |
| 2                 | 18             | C1B              | 21.65599403        | 37.29442420 | -8.21103292  |
| 2                 | 19             | C2B              | 22.88698546        | 37.02615249 | -7.48824537  |
| 2                 | 20             | C3B              | 23.72626157        | 38.07565055 | -7.73271142  |
| 2                 | 21             | C4B              | 23.02056661        | 38.97572735 | -8.64332862  |
| 2                 | 22             | CMB              | 23.11804852        | 35.83551992 | -6.61394141  |
| 2                 | 23             | CAB              | 25.06975552        | 38.24838315 | -7.17802162  |
| 2                 | 24             | CBB              | 25.60263087        | 39.39245417 | -6.74854367  |
| 2                 | 25             | NC               | 21.57405752        | 40.84621932 | -10.54947548 |
| 2                 | 26             | C1C              | 22.83909373        | 41.01259092 | -10.09255626 |
| 2                 | 27             | C2C              | 23.40694877        | 42.22364821 | -10.62220327 |
| 2                 | 28             | C3C              | 22.44284784        | 42.79307235 | -11.41806812 |
| 2                 | 29             | C4C              | 21.29587479        | 41.91995121 | -11.36608628 |
| 2                 | 30             | CMC              | 24.78331305        | 42.73297926 | -10.32586319 |
| 2                 | 31             | CAC              | 22.52621454        | 44.09354389 | -12.16011897 |
| 2                 | 32             | CBC              | 22.05411385        | 45.29056448 | -11.32548148 |
| 2                 | 33             | ND               | 18.92553445        | 40.13517839 | -11.24399086 |
| 2                 | 34             | C1D              | 18.96771413        | 41.28686400 | -12.02402373 |
| 2                 | 35             | C2D              | 17.73955555        | 41.41185939 | -12.77841841 |
| 2                 | 36             | C3D              | 16.99056568        | 40.30136448 | -12.42733031 |
| 2                 | 37             | C4D              | 17.75990666        | 39.56367890 | -11.50147623 |
| 2                 | 38             | CMD              | 17.36799802        | 42.50791817 | -13.72200438 |
| 2                 | 39             | CAD              | 15.73565695        | 39.57927015 | -12.65065513 |

| <b>Pigment No</b> | <b>Atom No</b> | <b>Atom Name</b> | <b>Coordinates</b> |             |              |
|-------------------|----------------|------------------|--------------------|-------------|--------------|
| 2                 | 40             | OBD              | 14.80903491        | 39.83891715 | -13.38314505 |
| 2                 | 41             | CBD              | 15.78348661        | 38.30824367 | -11.71935900 |
| 2                 | 42             | CGD              | 14.71834916        | 38.39333620 | -10.64365530 |
| 2                 | 43             | O1D              | 13.99861557        | 37.48539391 | -10.29578870 |
| 2                 | 44             | O2D              | 14.71216424        | 39.59810287 | -10.06243313 |
| 2                 | 45             | CED              | 13.79175923        | 39.76038373 | -8.97762853  |
| 2                 | 46             | C1               | 12.88950245        | 34.37315790 | -10.64766211 |
| 2                 | 47             | H                | 20.59061203        | 35.58003781 | -7.55422798  |
| 2                 | 48             | H                | 24.53147042        | 40.39055923 | -8.95960155  |
| 2                 | 49             | H                | 20.02314362        | 42.99599949 | -12.67973659 |
| 2                 | 50             | H                | 16.54502939        | 35.35998007 | -7.21982158  |
| 2                 | 51             | H                | 17.09839486        | 37.04142509 | -7.27805308  |
| 2                 | 52             | H                | 18.09913078        | 35.81168399 | -6.49132054  |
| 2                 | 53             | H                | 17.24901042        | 35.61607566 | -12.01601628 |
| 2                 | 54             | H                | 18.50408802        | 34.79524308 | -11.10083309 |
| 2                 | 55             | H                | 16.56141263        | 33.42536482 | -9.99468469  |
| 2                 | 56             | H                | 16.85434569        | 33.13933500 | -11.71680581 |
| 2                 | 57             | H                | 22.87779807        | 34.90257938 | -7.13436125  |
| 2                 | 58             | H                | 22.49242926        | 35.87388648 | -5.71420692  |
| 2                 | 59             | H                | 24.15711034        | 35.77568667 | -6.28253807  |
| 2                 | 60             | H                | 25.66183444        | 37.33916230 | -7.08386407  |
| 2                 | 61             | H                | 25.05273492        | 40.32761069 | -6.76329826  |
| 2                 | 62             | H                | 26.60801549        | 39.42077532 | -6.34084129  |
| 2                 | 63             | H                | 25.03334109        | 43.58816722 | -10.95792303 |
| 2                 | 64             | H                | 25.54483591        | 41.96447039 | -10.49690273 |
| 2                 | 65             | H                | 24.88178075        | 43.05751794 | -9.28324709  |
| 2                 | 66             | H                | 21.93559354        | 44.03617370 | -13.08118052 |
| 2                 | 67             | H                | 23.55885520        | 44.26489877 | -12.48254677 |
| 2                 | 68             | H                | 21.02489132        | 45.14717025 | -10.98315578 |
| 2                 | 69             | H                | 22.09370149        | 46.21572102 | -11.90901331 |
| 2                 | 70             | H                | 22.68238805        | 45.42027778 | -10.43902683 |

| <b>Pigment No</b> | <b>Atom No</b> | <b>Atom Name</b> | <b>Coordinates</b> |             |              |
|-------------------|----------------|------------------|--------------------|-------------|--------------|
| 2                 | 71             | H                | 16.42538211        | 42.27237320 | -14.21953076 |
| 2                 | 72             | H                | 18.13465065        | 42.65948801 | -14.48947310 |
| 2                 | 73             | H                | 17.24205176        | 43.46190562 | -13.19700092 |
| 2                 | 74             | H                | 15.57849592        | 37.40647070 | -12.30249972 |
| 2                 | 75             | H                | 13.92574786        | 40.78333205 | -8.63652658  |
| 2                 | 76             | H                | 14.01742323        | 39.04368710 | -8.18482284  |
| 2                 | 77             | H                | 12.76957390        | 39.59837098 | -9.32198803  |
| 2                 | 78             | H                | 12.30347010        | 33.98258889 | -9.81650196  |
| 2                 | 79             | H                | 12.53535153        | 33.96175365 | -11.59500143 |
| 2                 | 80             | H                | 12.84741674        | 35.46213660 | -10.68011239 |
| 2                 | 81             | H                | 16.19389698        | 36.13165849 | -9.63419151  |
| 2                 | 82             | H                | 18.43955366        | 34.67418204 | -8.69765313  |
| 3                 | 1              | MG               | 29.80984666        | 35.20398238 | 6.07802235   |
| 3                 | 2              | CHA              | 28.79274518        | 35.14014608 | 9.34690422   |
| 3                 | 3              | CHB              | 27.55036260        | 37.63795063 | 5.42073415   |
| 3                 | 4              | CHC              | 30.93976080        | 35.33035676 | 2.86096155   |
| 3                 | 5              | CHD              | 32.12804276        | 32.70117762 | 6.78460255   |
| 3                 | 6              | NA               | 28.40515851        | 36.24470298 | 7.23544276   |
| 3                 | 7              | C1A              | 28.15335996        | 36.07563941 | 8.58406926   |
| 3                 | 8              | C2A              | 27.12173653        | 37.07214284 | 9.07307360   |
| 3                 | 9              | C3A              | 26.54793733        | 37.62925381 | 7.75644569   |
| 3                 | 10             | C4A              | 27.56052102        | 37.16536994 | 6.72265318   |
| 3                 | 11             | CMA              | 25.14051134        | 37.10888949 | 7.44463131   |
| 3                 | 12             | CAA              | 27.75781388        | 38.16951871 | 9.94748331   |
| 3                 | 13             | CBA              | 26.72153369        | 39.10764259 | 10.58882496  |
| 3                 | 14             | CGA              | 25.95112466        | 38.39354462 | 11.67435319  |
| 3                 | 15             | O1A              | 26.35334395        | 38.21944240 | 12.79829661  |
| 3                 | 16             | O2A              | 24.76884297        | 37.93365321 | 11.22838777  |
| 3                 | 17             | NB               | 29.32135288        | 36.27499078 | 4.41925923   |
| 3                 | 18             | C1B              | 28.37912541        | 37.24151128 | 4.35773555   |
| 3                 | 19             | C2B              | 28.33046625        | 37.80520383 | 3.01941162   |

| <b>Pigment No</b> | <b>Atom No</b> | <b>Atom Name</b> | <b>Coordinates</b> |             |             |
|-------------------|----------------|------------------|--------------------|-------------|-------------|
| 3                 | 20             | C3B              | 29.25527114        | 37.13331196 | 2.27377978  |
| 3                 | 21             | C4B              | 29.89816831        | 36.17132221 | 3.16862780  |
| 3                 | 22             | CMB              | 27.39635874        | 38.89006967 | 2.58909273  |
| 3                 | 23             | CAB              | 29.54160201        | 37.35293888 | 0.85485414  |
| 3                 | 24             | CBB              | 29.78757267        | 36.40924088 | -0.05381211 |
| 3                 | 25             | NC               | 31.24782919        | 34.17029950 | 5.01023858  |
| 3                 | 26             | C1C              | 31.57124823        | 34.38834196 | 3.71332078  |
| 3                 | 27             | C2C              | 32.64444364        | 33.51797328 | 3.30824684  |
| 3                 | 28             | C3C              | 32.96907067        | 32.76138889 | 4.40633221  |
| 3                 | 29             | C4C              | 32.09318622        | 33.18342745 | 5.47239463  |
| 3                 | 30             | CMC              | 33.25322355        | 33.47915556 | 1.94111191  |
| 3                 | 31             | CAC              | 33.98908779        | 31.66552311 | 4.49669402  |
| 3                 | 32             | CBC              | 33.39460148        | 30.27854012 | 4.22161948  |
| 3                 | 33             | ND               | 30.35059315        | 34.08875627 | 7.67295197  |
| 3                 | 34             | C1D              | 31.32994903        | 33.11780309 | 7.84750886  |
| 3                 | 35             | C2D              | 31.36383822        | 32.69224893 | 9.22622808  |
| 3                 | 36             | C3D              | 30.37916689        | 33.44004654 | 9.85166075  |
| 3                 | 37             | C4D              | 29.80407641        | 34.27220704 | 8.86630003  |
| 3                 | 38             | CMD              | 32.26668751        | 31.67255428 | 9.83954689  |
| 3                 | 39             | CAD              | 29.69721271        | 33.69273097 | 11.11997257 |
| 3                 | 40             | OBD              | 29.88189417        | 33.21679689 | 12.21670965 |
| 3                 | 41             | CBD              | 28.59224445        | 34.77176567 | 10.81763407 |
| 3                 | 42             | CGD              | 27.20084705        | 34.20788536 | 11.02435947 |
| 3                 | 43             | O1D              | 26.27619365        | 34.80698100 | 11.52308203 |
| 3                 | 44             | O2D              | 27.09426499        | 32.97707021 | 10.51297417 |
| 3                 | 45             | CED              | 25.79848318        | 32.37213064 | 10.58529546 |
| 3                 | 46             | C1               | 24.02794281        | 37.14912109 | 12.17265554 |
| 3                 | 47             | H                | 26.81625469        | 38.40418191 | 5.19604982  |
| 3                 | 48             | H                | 31.33191994        | 35.39505386 | 1.85313829  |
| 3                 | 49             | H                | 32.86481207        | 31.93329801 | 7.00082077  |
| 3                 | 50             | H                | 24.78042035        | 37.49097265 | 6.48529772  |

| <b>Pigment No</b> | <b>Atom No</b> | <b>Atom Name</b> | <b>Coordinates</b> |             |             |
|-------------------|----------------|------------------|--------------------|-------------|-------------|
| 3                 | 51             | H                | 24.44467486        | 37.41984070 | 8.22965767  |
| 3                 | 52             | H                | 25.13223977        | 36.01498103 | 7.39666811  |
| 3                 | 53             | H                | 28.44678228        | 38.76080629 | 9.33332882  |
| 3                 | 54             | H                | 28.35459025        | 37.72000104 | 10.74638660 |
| 3                 | 55             | H                | 26.02754760        | 39.49474899 | 9.83872292  |
| 3                 | 56             | H                | 27.23479047        | 39.95116139 | 11.05683346 |
| 3                 | 57             | H                | 27.56316620        | 39.17549795 | 1.54818547  |
| 3                 | 58             | H                | 27.51337481        | 39.78717966 | 3.20689916  |
| 3                 | 59             | H                | 26.35074015        | 38.57299880 | 2.67658622  |
| 3                 | 60             | H                | 29.51486978        | 38.39077086 | 0.52665088  |
| 3                 | 61             | H                | 29.78137758        | 35.35287654 | 0.19429280  |
| 3                 | 62             | H                | 29.97935586        | 36.66798245 | -1.09006489 |
| 3                 | 63             | H                | 33.74886821        | 34.42362304 | 1.68941832  |
| 3                 | 64             | H                | 32.49774282        | 33.29623588 | 1.16856104  |
| 3                 | 65             | H                | 33.99850028        | 32.68491076 | 1.85890672  |
| 3                 | 66             | H                | 34.80067195        | 31.85774271 | 3.78686314  |
| 3                 | 67             | H                | 34.45606980        | 31.67095093 | 5.48778396  |
| 3                 | 68             | H                | 32.98527020        | 30.22533166 | 3.20810599  |
| 3                 | 69             | H                | 32.58008651        | 30.05701299 | 4.91788698  |
| 3                 | 70             | H                | 34.15338284        | 29.49667888 | 4.32389020  |
| 3                 | 71             | H                | 32.19986442        | 30.70849186 | 9.32404715  |
| 3                 | 72             | H                | 31.99990346        | 31.51990819 | 10.88719105 |
| 3                 | 73             | H                | 33.31440725        | 31.99094220 | 9.79941537  |
| 3                 | 74             | H                | 28.70644137        | 35.60800030 | 11.51163692 |
| 3                 | 75             | H                | 25.89512603        | 31.41881258 | 10.07185461 |
| 3                 | 76             | H                | 25.05735754        | 33.01080874 | 10.09991806 |
| 3                 | 77             | H                | 25.51027359        | 32.22221681 | 11.62709525 |
| 3                 | 78             | H                | 23.08037819        | 36.92425441 | 11.68399111 |
| 3                 | 79             | H                | 23.86247227        | 37.71829173 | 13.08905666 |
| 3                 | 80             | H                | 24.57545699        | 36.23363516 | 12.39778821 |
| 3                 | 81             | H                | 26.34916462        | 36.56606323 | 9.65851748  |



| <b>Pigment No</b> | <b>Atom No</b> | <b>Atom Name</b> | <b>Coordinates</b> |             |             |
|-------------------|----------------|------------------|--------------------|-------------|-------------|
| 3                 | 82             | H                | 26.51530987        | 38.72417570 | 7.77239410  |
| 4                 | 1              | MG               | 21.85846833        | 30.01575309 | 8.45772755  |
| 4                 | 2              | CHA              | 24.97520587        | 28.56288638 | 8.41586815  |
| 4                 | 3              | CHB              | 21.73685211        | 29.82428554 | 5.08515411  |
| 4                 | 4              | CHC              | 18.69780728        | 31.26002440 | 8.55593411  |
| 4                 | 5              | CHD              | 22.07797256        | 30.28886405 | 11.91876130 |
| 4                 | 6              | NA               | 23.17825639        | 29.28113502 | 6.98911059  |
| 4                 | 7              | C1A              | 24.40237858        | 28.67715338 | 7.18123175  |
| 4                 | 8              | C2A              | 24.95424747        | 28.14858726 | 5.87354653  |
| 4                 | 9              | C3A              | 24.08416912        | 28.88189454 | 4.83346448  |
| 4                 | 10             | C4A              | 22.90686086        | 29.36097329 | 5.66657036  |
| 4                 | 11             | CMA              | 24.82114646        | 30.04130552 | 4.15688419  |
| 4                 | 12             | CAA              | 24.80904119        | 26.61715303 | 5.79211075  |
| 4                 | 13             | CBA              | 25.44584132        | 25.99674200 | 4.53762713  |
| 4                 | 14             | CGA              | 26.95101920        | 26.11999141 | 4.56181179  |
| 4                 | 15             | O1A              | 27.69672490        | 25.30863425 | 5.05208445  |
| 4                 | 16             | O2A              | 27.36980042        | 27.26806838 | 3.99726279  |
| 4                 | 17             | NB               | 20.42201715        | 30.38538063 | 7.06662855  |
| 4                 | 18             | C1B              | 20.57657267        | 30.28885394 | 5.72938701  |
| 4                 | 19             | C2B              | 19.36767485        | 30.73603152 | 5.05728705  |
| 4                 | 20             | C3B              | 18.47889509        | 31.08517216 | 6.03475637  |
| 4                 | 21             | C4B              | 19.16371586        | 30.89838987 | 7.31344249  |
| 4                 | 22             | CMB              | 19.17166795        | 30.75830890 | 3.57595284  |
| 4                 | 23             | CAB              | 17.11263237        | 31.56726226 | 5.82792628  |
| 4                 | 24             | CBB              | 16.05180233        | 31.26814245 | 6.57819034  |
| 4                 | 25             | NC               | 20.61837301        | 30.66730433 | 9.97207104  |
| 4                 | 26             | C1C              | 19.36590194        | 31.15685048 | 9.80362085  |
| 4                 | 27             | C2C              | 18.80431028        | 31.55139693 | 11.06882291 |
| 4                 | 28             | C3C              | 19.75437463        | 31.27463737 | 12.02102966 |
| 4                 | 29             | C4C              | 20.88921362        | 30.72302154 | 11.32211256 |
| 4                 | 30             | CMC              | 17.44558419        | 32.15120167 | 11.25756786 |

| <b>Pigment No</b> | <b>Atom No</b> | <b>Atom Name</b> | <b>Coordinates</b> |             |             |
|-------------------|----------------|------------------|--------------------|-------------|-------------|
| 4                 | 31             | CAC              | 19.67690605        | 31.53502932 | 13.49604192 |
| 4                 | 32             | CBC              | 20.32574219        | 32.86349193 | 13.90535682 |
| 4                 | 33             | ND               | 23.24754483        | 29.65301315 | 9.88592184  |
| 4                 | 34             | C1D              | 23.19106090        | 29.75684822 | 11.27249178 |
| 4                 | 35             | C2D              | 24.38126028        | 29.18917529 | 11.85963771 |
| 4                 | 36             | C3D              | 25.12289043        | 28.72967627 | 10.78390357 |
| 4                 | 37             | C4D              | 24.38520201        | 29.02710701 | 9.61631278  |
| 4                 | 38             | CMD              | 24.71950341        | 29.10366447 | 13.31226748 |
| 4                 | 39             | CAD              | 26.35291294        | 28.04548193 | 10.38770495 |
| 4                 | 40             | OBD              | 27.25772538        | 27.60698789 | 11.06034512 |
| 4                 | 41             | CBD              | 26.31286653        | 27.94356909 | 8.81670806  |
| 4                 | 42             | CGD              | 27.46482360        | 28.69164686 | 8.18077249  |
| 4                 | 43             | O1D              | 28.14333780        | 28.27800396 | 7.26933591  |
| 4                 | 44             | O2D              | 27.60163374        | 29.91108303 | 8.71205717  |
| 4                 | 45             | CED              | 28.62391218        | 30.73243191 | 8.13941093  |
| 4                 | 46             | C1               | 28.78011121        | 27.50749536 | 4.08832487  |
| 4                 | 47             | H                | 21.71339914        | 29.81581397 | 4.00038475  |
| 4                 | 48             | H                | 17.70749731        | 31.69897136 | 8.58643326  |
| 4                 | 49             | H                | 22.12598758        | 30.35167608 | 13.00198927 |
| 4                 | 50             | H                | 24.17692324        | 30.56709393 | 3.44560722  |
| 4                 | 51             | H                | 25.69386031        | 29.65922916 | 3.61888292  |
| 4                 | 52             | H                | 25.16722240        | 30.76921310 | 4.89790544  |
| 4                 | 53             | H                | 25.26008893        | 26.15304386 | 6.67451164  |
| 4                 | 54             | H                | 23.74316403        | 26.36118259 | 5.81200184  |
| 4                 | 55             | H                | 25.21416696        | 24.93000781 | 4.50719605  |
| 4                 | 56             | H                | 25.05243827        | 26.46335190 | 3.63020087  |
| 4                 | 57             | H                | 19.97192283        | 31.31345708 | 3.07464211  |
| 4                 | 58             | H                | 18.22208194        | 31.22612658 | 3.30585393  |
| 4                 | 59             | H                | 19.16773748        | 29.74665277 | 3.15435036  |
| 4                 | 60             | H                | 16.96446653        | 32.20317661 | 4.95665891  |
| 4                 | 61             | H                | 16.11844558        | 30.59925702 | 7.42994820  |

| Pigment No | Atom No | Atom Name | Coordinates |             |             |
|------------|---------|-----------|-------------|-------------|-------------|
| 4          | 62      | H         | 15.07024509 | 31.66680845 | 6.34346019  |
| 4          | 63      | H         | 16.66078468 | 31.52376732 | 10.82082918 |
| 4          | 64      | H         | 17.37036306 | 33.13739101 | 10.78580239 |
| 4          | 65      | H         | 17.20835694 | 32.27817039 | 12.31667078 |
| 4          | 66      | H         | 20.15022995 | 30.71443904 | 14.04715905 |
| 4          | 67      | H         | 18.62804177 | 31.53796522 | 13.80975118 |
| 4          | 68      | H         | 21.39077153 | 32.87459077 | 13.65581957 |
| 4          | 69      | H         | 20.22515540 | 33.03292187 | 14.98206087 |
| 4          | 70      | H         | 19.85478026 | 33.70164750 | 13.38291999 |
| 4          | 71      | H         | 25.70704516 | 28.65729046 | 13.44133376 |
| 4          | 72      | H         | 23.99353854 | 28.48933609 | 13.85642184 |
| 4          | 73      | H         | 24.72480345 | 30.09272377 | 13.78303945 |
| 4          | 74      | H         | 26.41838739 | 26.89430411 | 8.52982210  |
| 4          | 75      | H         | 28.56208788 | 31.68239962 | 8.66358218  |
| 4          | 76      | H         | 28.45060079 | 30.85857028 | 7.06826212  |
| 4          | 77      | H         | 29.60150925 | 30.27148147 | 8.28863822  |
| 4          | 78      | H         | 29.33302868 | 26.69675199 | 3.61018870  |
| 4          | 79      | H         | 29.07358059 | 27.58888898 | 5.13558473  |
| 4          | 80      | H         | 28.95149703 | 28.44852793 | 3.56628363  |
| 4          | 81      | H         | 26.00966456 | 28.40543637 | 5.76146722  |
| 4          | 82      | H         | 23.73209451 | 28.19269723 | 4.05928962  |

Table S3: Cartesian atomic coordinates of the four Chl *a* chromophores in WSCP after geometry optimization on each dimer in vacuum with DFT using the CAM-B3LYP XC-functional and a 6-31-G\* basis set, as described in the Computational Details section in the main text. During the geometry optimizations the coordinates of the nitrogen atoms were held fixed in order to preserve the relative orientation of the pigments. The atom numbers are related to the structure of Chl *a* in Fig. S2. The attachments to this document include the above cartesian atomic coordinates in the file *table\_s3\_coordinates.xyz*.

| $N$ | Embedding | $\omega^N$ (eV) | $\mu^N$ (D) | $\vartheta^N$ ( $^\circ$ ) | $\varphi^N$ ( $^\circ$ ) |
|-----|-----------|-----------------|-------------|----------------------------|--------------------------|
| 1   | none      | 2.147           | 5.26        | -1.4                       | -6.8                     |
|     | impl      | 2.111           | 6.33        | -1.5                       | -6.2                     |
|     | impl+expl |                 | 3.65        | -3.0                       | -4.5                     |
| 2   | none      | 2.140           | 5.26        | -2.7                       | -6.8                     |
|     | impl      | 2.103           | 6.33        | -2.7                       | -6.0                     |
|     | impl+expl |                 | 3.60        | -4.1                       | -4.9                     |
| 3   | none      | 2.148           | 5.30        | -1.8                       | -6.2                     |
|     | impl      | 2.112           | 6.36        | -1.9                       | -5.7                     |
|     | impl+expl |                 | 3.66        | -3.4                       | -4.5                     |
| 4   | none      | 2.143           | 5.26        | -3.0                       | -6.4                     |
|     | impl      | 2.105           | 6.34        | -3.3                       | -5.8                     |
|     | impl+expl |                 | 3.63        | -5.0                       | -4.4                     |

Table S4: Same as in Table 3 of the main text, but using the optimized dimer geometry (Table S3).

| $M$ | $N$ | $V_{MN}^{ES}(\varepsilon=1)$ | $V_{MN}^{ES}(\varepsilon=2)$ | $V_{MN}^{ES}(\varepsilon=2)+V_{MN}^{solv}(\varepsilon=2)$ | $f_{MN}^{rf}$ | $s_{MN}$ |
|-----|-----|------------------------------|------------------------------|-----------------------------------------------------------|---------------|----------|
| 3   | 4   | 132                          | 188                          | 116                                                       | 1.422         | 0.618    |
| 1   | 2   | 131                          | 188                          | 116                                                       | 1.431         | 0.620    |
| 2   | 3   | 34                           | 47                           | 29                                                        | 1.383         | 0.600    |
| 1   | 4   | 32                           | 44                           | 27                                                        | 1.397         | 0.602    |
| 2   | 4   | 10                           | 15                           | 10                                                        | 1.512         | 0.680    |
| 1   | 3   | 9                            | 14                           | 10                                                        | 1.496         | 0.703    |

Table S5: Same as in Table 4 of the main text but using the optimized dimer geometry (Table S3).

## Effect of varying the static dielectric constant on FMO0-FRET and FMO0-FRET-PCMO calculations

| $N$ | Embedding | $\omega^N$ (eV) | $\mu^N$ (D) | $\vartheta^N$ ( $^\circ$ ) | $\varphi^N$ ( $^\circ$ ) |
|-----|-----------|-----------------|-------------|----------------------------|--------------------------|
| 1   | none      | 2.140           | 5.31        | 0.0                        | -6.9                     |
|     | impl      | 2.100           | 6.39        | -0.1                       | -5.9                     |
|     | impl+expl | 2.100           | 3.68        | -0.8                       | -4.4                     |
| 2   | none      | 2.131           | 5.32        | -1.8                       | -6.6                     |
|     | impl      | 2.090           | 6.36        | -1.8                       | -5.8                     |
|     | impl+expl | 2.090           | 3.63        | -2.4                       | -4.5                     |
| 3   | none      | 2.136           | 5.36        | 0.1                        | -6.4                     |
|     | impl      | 2.096           | 6.43        | 0.0                        | -5.7                     |
|     | impl+expl | 2.096           | 3.71        | -1.1                       | -4.5                     |
| 4   | none      | 2.134           | 5.32        | -1.4                       | -6.2                     |
|     | impl      | 2.094           | 6.40        | -1.6                       | -5.6                     |
|     | impl+expl | 2.094           | 3.66        | -3.6                       | -4.3                     |

Table S6: Same as in Table 1 of the main text, but using  $\epsilon_s=2$ .

| $M$ | $N$ | $V_{MN}^{ES}(\epsilon=1)$ | $V_{MN}^{ES}(\epsilon=2)$ | $V_{MN}^{ES}(\epsilon=2)+V_{MN}^{solv}(\epsilon=2)$ | $f_{MN}^{rf}$ | $S_{MN}$ |
|-----|-----|---------------------------|---------------------------|-----------------------------------------------------|---------------|----------|
| 3   | 4   | 147                       | 208                       | 129                                                 | 1.412         | 0.621    |
| 1   | 2   | 142                       | 201                       | 125                                                 | 1.409         | 0.621    |
| 2   | 3   | 35                        | 48                        | 29                                                  | 1.394         | 0.599    |
| 1   | 4   | 32                        | 45                        | 27                                                  | 1.416         | 0.602    |
| 2   | 4   | 10                        | 14                        | 10                                                  | 1.462         | 0.684    |
| 1   | 3   | 9                         | 12                        | 9                                                   | 1.452         | 0.716    |

Table S7: Same as in Table 2 of the main text, but using  $\epsilon_s=2$ .

| $N$ | Embedding | $\omega^N$ (eV) | $\mu^N$ (D) | $\vartheta^N$ ( $^\circ$ ) | $\varphi^N$ ( $^\circ$ ) |
|-----|-----------|-----------------|-------------|----------------------------|--------------------------|
| 1   | none      | 2.140           | 5.31        | 0.0                        | -6.9                     |
|     | impl      | 2.102           | 6.42        | -0.1                       | -5.3                     |
|     | impl+expl | 2.102           | 3.71        | -0.7                       | -3.8                     |
| 2   | none      | 2.131           | 5.32        | -1.8                       | -6.6                     |
|     | impl      | 2.092           | 6.42        | -1.7                       | -5.4                     |
|     | impl+expl | 2.092           | 3.66        | -2.4                       | -4.1                     |
| 3   | none      | 2.136           | 5.36        | 0.1                        | -6.4                     |
|     | impl      | 2.098           | 6.45        | 0.0                        | -5.1                     |
|     | impl+expl | 2.098           | 3.73        | -1.1                       | -4.0                     |
| 4   | none      | 2.134           | 5.32        | -1.4                       | -6.2                     |
|     | impl      | 2.095           | 6.43        | -1.7                       | -5.0                     |
|     | impl+expl | 2.095           | 3.69        | -3.6                       | -3.6                     |

Table S8: Same as in Table 1 of the main text, but using  $\varepsilon_s=10$  .

| $M$ | $N$ | $V_{MN}^{ES}(\varepsilon=1)$ | $V_{MN}^{ES}(\varepsilon=2)$ | $V_{MN}^{ES}(\varepsilon=2)+V_{MN}^{solv}(\varepsilon=2)$ | $f_{MN}^{rf}$ | $S_{MN}$ |
|-----|-----|------------------------------|------------------------------|-----------------------------------------------------------|---------------|----------|
| 3   | 4   | 147                          | 212                          | 132                                                       | 1.611         | 0.621    |
| 1   | 2   | 142                          | 206                          | 128                                                       | 1.610         | 0.621    |
| 2   | 3   | 35                           | 48                           | 29                                                        | 1.666         | 0.600    |
| 1   | 4   | 32                           | 44                           | 27                                                        | 1.658         | 0.603    |
| 2   | 4   | 10                           | 15                           | 10                                                        | 1.468         | 0.681    |
| 1   | 3   | 9                            | 13                           | 9                                                         | 1.407         | 0.711    |

Table S9: Same as in Table 2 of the main text, but using  $\varepsilon_s=10$  .

| $N$ | Embedding | $\omega^N$ (eV) | $\mu^N$ (D) | $\vartheta^N$ ( $^\circ$ ) | $\varphi^N$ ( $^\circ$ ) |
|-----|-----------|-----------------|-------------|----------------------------|--------------------------|
| 1   | none      | 2.140           | 5.31        | 0.0                        | -6.9                     |
|     | impl      | 2.102           | 6.42        | -0.1                       | -5.2                     |
|     | impl+expl | 2.102           | 3.71        | -0.7                       | -3.6                     |
| 2   | none      | 2.131           | 5.32        | -1.8                       | -6.6                     |
|     | impl      | 2.092           | 6.42        | -1.7                       | -5.3                     |
|     | impl+expl | 2.092           | 3.66        | -2.4                       | -4.0                     |
| 3   | none      | 2.136           | 5.36        | 0.1                        | -6.4                     |
|     | impl      | 2.098           | 6.46        | 0.0                        | -5.0                     |
|     | impl+expl | 2.098           | 3.74        | -1.1                       | -3.8                     |
| 4   | none      | 2.134           | 5.32        | -1.4                       | -6.2                     |
|     | impl      | 2.096           | 6.45        | -1.7                       | -4.9                     |
|     | impl+expl | 2.096           | 3.70        | -3.6                       | -3.6                     |

Table S10: Same as in Table 1 of the main text, but using  $\varepsilon_s=20$ .

| $M$ | $N$ | $V_{MN}^{ES}(\varepsilon=1)$ | $V_{MN}^{ES}(\varepsilon=2)$ | $V_{MN}^{ES}(\varepsilon=2)+V_{MN}^{solv}(\varepsilon=2)$ | $f_{MN}^{rf}$ | $S_{MN}$ |
|-----|-----|------------------------------|------------------------------|-----------------------------------------------------------|---------------|----------|
| 3   | 4   | 147                          | 213                          | 132                                                       | 1.610         | 0.621    |
| 1   | 2   | 142                          | 207                          | 128                                                       | 1.610         | 0.621    |
| 2   | 3   | 35                           | 47                           | 28                                                        | 1.665         | 0.601    |
| 1   | 4   | 32                           | 44                           | 27                                                        | 1.657         | 0.603    |
| 2   | 4   | 10                           | 15                           | 10                                                        | 1.470         | 0.680    |
| 1   | 3   | 9                            | 13                           | 9                                                         | 1.409         | 0.710    |

Table S11: Same as in Table 2 of the main text, but using  $\varepsilon_s=20$ .

## Effect of varying the functional on FMO0-FRET and FMO0-FRET-PCM0 calculations

| $N$ | Embedding | $\omega^N$ (eV) | $\mu^N$ (D) | $\vartheta^N$ ( $^\circ$ ) | $\varphi^N$ ( $^\circ$ ) |
|-----|-----------|-----------------|-------------|----------------------------|--------------------------|
| 1   | none      | 2.431           | 6.21        | 0.2                        | -8.7                     |
|     | impl      | 2.391           | 7.10        | 0.2                        | -8.8                     |
|     | impl+expl | 2.391           | 4.10        | -0.4                       | -7.0                     |
| 2   | none      | 2.410           | 6.22        | -1.4                       | -7.9                     |
|     | impl      | 2.370           | 7.10        | -1.4                       | -8.0                     |
|     | impl+expl | 2.370           | 4.06        | -2.1                       | -6.6                     |
| 3   | none      | 2.423           | 6.25        | 0.2                        | -7.9                     |
|     | impl      | 2.383           | 7.15        | 0.2                        | -8.1                     |
|     | impl+expl | 2.383           | 4.14        | -1.2                       | -6.9                     |
| 4   | none      | 2.419           | 6.22        | -1.5                       | -7.9                     |
|     | impl      | 2.377           | 7.13        | -1.8                       | -8.0                     |
|     | impl+expl | 2.377           | 4.07        | -3.8                       | -6.7                     |

Table S12: Same as in Table 1 of the main text, but using HF-CIS.

| $M$ | $N$ | $V_{MN}^{ES}(\varepsilon=1)$ | $V_{MN}^{ES}(\varepsilon=2)$ | $V_{MN}^{ES}(\varepsilon=2)+V_{MN}^{solv}(\varepsilon=2)$ | $f_{MN}^{rf}$ | $S_{MN}$ |
|-----|-----|------------------------------|------------------------------|-----------------------------------------------------------|---------------|----------|
| 3   | 4   | 205                          | 265                          | 164                                                       | 1.293         | 0.618    |
| 1   | 2   | 198                          | 256                          | 158                                                       | 1.292         | 0.619    |
| 2   | 3   | 44                           | 55                           | 33                                                        | 1.255         | 0.601    |
| 1   | 4   | 41                           | 52                           | 31                                                        | 1.272         | 0.603    |
| 2   | 4   | 12                           | 16                           | 11                                                        | 1.296         | 0.701    |
| 1   | 3   | 10                           | 13                           | 10                                                        | 1.292         | 0.737    |

Table S13: Same as in Table 2 of the main text, but using HF-CIS.



| $N$ | Embedding | $\omega^N$ (eV) | $\mu^N$ (D) | $\vartheta^N$ ( $^\circ$ ) | $\varphi^N$ ( $^\circ$ ) |
|-----|-----------|-----------------|-------------|----------------------------|--------------------------|
| 1   | none      | 2.159           | 5.25        | 0.0                        | -6.6                     |
|     | impl      | 2.115           | 6.45        | 0.0                        | -6.0                     |
|     | impl+expl | 2.115           | 3.72        | -0.9                       | -4.4                     |
| 2   | none      | 2.154           | 5.23        | -1.7                       | -6.9                     |
|     | impl      | 2.110           | 6.42        | -1.7                       | -6.2                     |
|     | impl+expl | 2.110           | 3.67        | -2.2                       | -5.0                     |
| 3   | none      | 2.156           | 5.28        | 0.1                        | -6.3                     |
|     | impl      | 2.113           | 6.48        | 0.1                        | -5.9                     |
|     | impl+expl | 2.113           | 3.75        | -0.7                       | -4.8                     |
| 4   | none      | 2.156           | 5.24        | -1.0                       | -6.3                     |
|     | impl      | 2.112           | 6.46        | -1.3                       | -5.8                     |
|     | impl+expl | 2.112           | 3.70        | -3.3                       | -4.6                     |

Table S14: Same as in Table 1 of the main text, but using the B3LYP XC-functional.

| $M$ | $N$ | $V_{MN}^{ES}(\varepsilon=1)$ | $V_{MN}^{ES}(\varepsilon=2)$ | $V_{MN}^{ES}(\varepsilon=2)+V_{MN}^{solv}(\varepsilon=2)$ | $f_{MN}^{rf}$ | $S_{MN}$ |
|-----|-----|------------------------------|------------------------------|-----------------------------------------------------------|---------------|----------|
| 3   | 4   | 138                          | 206                          | 128                                                       | 1.492         | 0.621    |
| 1   | 2   | 134                          | 200                          | 124                                                       | 1.492         | 0.621    |
| 2   | 3   | 36                           | 51                           | 31                                                        | 1.440         | 0.597    |
| 1   | 4   | 33                           | 48                           | 29                                                        | 1.458         | 0.600    |
| 2   | 4   | 8                            | 13                           | 9                                                         | 1.583         | 0.691    |
| 1   | 3   | 7                            | 12                           | 8                                                         | 1.570         | 0.723    |

Table S15: Same as in Table 2 of the main text, but using the B3LYP XC-functional.

## Geometry optimization with Hartree-Fock to eliminate grid dependence

| Pigment No | Atom No | Atom Name | Coordinates |             |             |
|------------|---------|-----------|-------------|-------------|-------------|
|            |         |           | X (Å)       | Y (Å)       | Z (Å)       |
| 1          | 1       | MG        | 12.39356320 | 40.61689038 | -4.55971318 |
| 1          | 2       | CHA       | 13.68516146 | 43.01130108 | -6.64824268 |
| 1          | 3       | CHB       | 14.81343882 | 41.34775597 | -2.29748413 |
| 1          | 4       | CHC       | 11.12021273 | 38.27799663 | -2.46038364 |
| 1          | 5       | CHD       | 9.95435005  | 39.86534116 | -6.88748466 |
| 1          | 6       | NA        | 13.97673627 | 42.03719796 | -4.47437405 |
| 1          | 7       | C1A       | 14.30150510 | 42.97834223 | -5.45985957 |
| 1          | 8       | C2A       | 15.37312138 | 43.91661887 | -4.93475700 |
| 1          | 9       | C3A       | 15.94486891 | 43.10696769 | -3.75417445 |
| 1          | 10      | C4A       | 14.83519244 | 42.10283536 | -3.48282167 |
| 1          | 11      | CMA       | 17.26223308 | 42.39734661 | -4.09549894 |
| 1          | 12      | CAA       | 14.74889012 | 45.25385485 | -4.48544011 |
| 1          | 13      | CBA       | 15.77738674 | 46.33146657 | -4.09967419 |
| 1          | 14      | CGA       | 16.47782484 | 46.88208692 | -5.32063793 |
| 1          | 15      | O1A       | 15.99701852 | 47.69261304 | -6.04520182 |
| 1          | 16      | O2A       | 17.67392711 | 46.34793533 | -5.50693648 |
| 1          | 17      | NB        | 12.89280075 | 39.92286737 | -2.72796570 |
| 1          | 18      | C1B       | 13.90316461 | 40.35686080 | -1.96710272 |
| 1          | 19      | C2B       | 13.92370709 | 39.60704679 | -0.69473120 |
| 1          | 20      | C3B       | 12.91561547 | 38.72597363 | -0.74601803 |
| 1          | 21      | C4B       | 12.22682453 | 38.92813289 | -2.04195577 |
| 1          | 22      | CMB       | 14.93089549 | 39.82011770 | 0.39490706  |
| 1          | 23      | CAB       | 12.55186410 | 37.74525627 | 0.29643389  |
| 1          | 24      | CBB       | 12.30711682 | 36.46283032 | 0.09131602  |
| 1          | 25      | NC        | 10.79810915 | 39.29324834 | -4.66113689 |
| 1          | 26      | C1C       | 10.43420682 | 38.44806981 | -3.72252065 |
| 1          | 27      | C2C       | 9.26489214  | 37.69823743 | -4.12081827 |
| 1          | 28      | C3C       | 8.93808167  | 38.13970601 | -5.36544984 |

| <b>Pigment No</b> | <b>Atom No</b> | <b>Atom Name</b> | <b>Coordinates</b> |             |             |
|-------------------|----------------|------------------|--------------------|-------------|-------------|
| 1                 | 29             | C4C              | 9.90764820         | 39.15222878 | -5.71709889 |
| 1                 | 30             | CMC              | 8.59075342         | 36.64561495 | -3.28592846 |
| 1                 | 31             | CAC              | 7.81506141         | 37.65952682 | -6.24634901 |
| 1                 | 32             | CBC              | 8.23547909         | 36.52132527 | -7.18603741 |
| 1                 | 33             | ND               | 11.91576321        | 41.22677960 | -6.40638580 |
| 1                 | 34             | C1D              | 10.88608405        | 40.86030961 | -7.25834875 |
| 1                 | 35             | C2D              | 10.93009441        | 41.62315875 | -8.44165913 |
| 1                 | 36             | C3D              | 12.03175097        | 42.47146250 | -8.27376964 |
| 1                 | 37             | C4D              | 12.57203076        | 42.17583877 | -7.02686706 |
| 1                 | 38             | CMD              | 10.01812006        | 41.54416169 | -9.63125384 |
| 1                 | 39             | CAD              | 12.78814532        | 43.55622253 | -8.87756602 |
| 1                 | 40             | OBD              | 12.65082947        | 44.12292895 | -9.91940464 |
| 1                 | 41             | CBD              | 13.91675989        | 43.92756900 | -7.85739771 |
| 1                 | 42             | CGD              | 15.28937095        | 43.71985347 | -8.46456101 |
| 1                 | 43             | O1D              | 16.20680007        | 44.46624869 | -8.32297854 |
| 1                 | 44             | O2D              | 15.37165269        | 42.58833774 | -9.13846908 |
| 1                 | 45             | CED              | 16.61082687        | 42.28575232 | -9.75282631 |
| 1                 | 46             | C1               | 18.37367733        | 46.74087437 | -6.68047518 |
| 1                 | 47             | H                | 15.58392210        | 41.56620184 | -1.58348800 |
| 1                 | 48             | H                | 10.69723174        | 37.55661595 | -1.79102758 |
| 1                 | 49             | H                | 9.18856773         | 39.64739452 | -7.60940139 |
| 1                 | 50             | H                | 18.02955168        | 43.13069217 | -4.31862277 |
| 1                 | 51             | H                | 17.14410766        | 41.75786793 | -4.96477062 |
| 1                 | 52             | H                | 17.60615626        | 41.78257461 | -3.27131344 |
| 1                 | 53             | H                | 14.09904930        | 45.07137714 | -3.63402476 |
| 1                 | 54             | H                | 14.12053839        | 45.65175374 | -5.27285123 |
| 1                 | 55             | H                | 15.25765285        | 47.16111365 | -3.63630378 |
| 1                 | 56             | H                | 16.50805114        | 45.94957283 | -3.39790293 |
| 1                 | 57             | H                | 14.88307193        | 40.83436696 | 0.77991699  |
| 1                 | 58             | H                | 15.93979348        | 39.65763427 | 0.02791638  |
| 1                 | 59             | H                | 14.76696709        | 39.13811461 | 1.21894350  |

| <b>Pigment No</b> | <b>Atom No</b> | <b>Atom Name</b> | <b>Coordinates</b> |             |              |
|-------------------|----------------|------------------|--------------------|-------------|--------------|
| 1                 | 60             | H                | 12.51825506        | 38.12434193 | 1.30425475   |
| 1                 | 61             | H                | 12.35306367        | 36.01929882 | -0.88678064  |
| 1                 | 62             | H                | 12.06695909        | 35.80786780 | 0.90926895   |
| 1                 | 63             | H                | 7.72582214         | 36.23656951 | -3.79255655  |
| 1                 | 64             | H                | 8.25208236         | 37.04540841 | -2.33418334  |
| 1                 | 65             | H                | 9.26032464         | 35.81729842 | -3.07012956  |
| 1                 | 66             | H                | 6.99008446         | 37.32572686 | -5.62692930  |
| 1                 | 67             | H                | 7.42886364         | 38.48679641 | -6.83254557  |
| 1                 | 68             | H                | 8.57856018         | 35.66016210 | -6.62244267  |
| 1                 | 69             | H                | 9.04410722         | 36.83153194 | -7.83912052  |
| 1                 | 70             | H                | 7.40096281         | 36.20850908 | -7.80607939  |
| 1                 | 71             | H                | 10.10733326        | 42.44211566 | -10.22867021 |
| 1                 | 72             | H                | 8.97973668         | 41.43127102 | -9.33778504  |
| 1                 | 73             | H                | 10.27689951        | 40.70028019 | -10.26519843 |
| 1                 | 74             | H                | 13.83779552        | 44.98049496 | -7.61901770  |
| 1                 | 75             | H                | 16.46352123        | 41.34734659 | -10.26331096 |
| 1                 | 76             | H                | 17.38881533        | 42.19047920 | -9.00868469  |
| 1                 | 77             | H                | 16.88050892        | 43.05850450 | -10.45755203 |
| 1                 | 78             | H                | 19.31066862        | 46.20654455 | -6.65296240  |
| 1                 | 79             | H                | 18.55009689        | 47.80666792 | -6.67082712  |
| 1                 | 80             | H                | 17.80857877        | 46.46809006 | -7.55721392  |
| 1                 | 81             | H                | 16.12654746        | 44.10662133 | -5.68666214  |
| 1                 | 82             | H                | 16.10139686        | 43.72534024 | -2.87736179  |
| 2                 | 1              | MG               | 20.30756365        | 39.31637283 | -10.13175483 |
| 2                 | 2              | CHA              | 17.11708965        | 38.49813512 | -11.08797291 |
| 2                 | 3              | CHB              | 20.43817567        | 36.47212421 | -8.28892580  |
| 2                 | 4              | CHC              | 23.47365982        | 40.08596935 | -9.19196140  |
| 2                 | 5              | CHD              | 20.14725535        | 42.22226183 | -11.99377167 |
| 2                 | 6              | NA               | 18.97699173        | 37.68786372 | -9.80588565  |
| 2                 | 7              | C1A              | 17.69635777        | 37.53968884 | -10.35379699 |
| 2                 | 8              | C2A              | 17.15638165        | 36.16067900 | -10.02072364 |

| <b>Pigment No</b> | <b>Atom No</b> | <b>Atom Name</b> | <b>Coordinates</b> |             |              |
|-------------------|----------------|------------------|--------------------|-------------|--------------|
| 2                 | 9              | C3A              | 18.05534046        | 35.75167879 | -8.83715857  |
| 2                 | 10             | C4A              | 19.24081452        | 36.69203739 | -8.99141123  |
| 2                 | 11             | CMA              | 17.37493889        | 35.93800468 | -7.47415124  |
| 2                 | 12             | CAA              | 17.30646469        | 35.21428079 | -11.22968528 |
| 2                 | 13             | CBA              | 16.62912944        | 33.84502374 | -11.04519100 |
| 2                 | 14             | CGA              | 15.12418524        | 33.96563796 | -11.11745655 |
| 2                 | 15             | O1A              | 14.52068327        | 34.06420294 | -12.13687700 |
| 2                 | 16             | O2A              | 14.55468231        | 33.97224401 | -9.92321813  |
| 2                 | 17             | NB               | 21.68983840        | 38.45146225 | -8.93735344  |
| 2                 | 18             | C1B              | 21.55631690        | 37.29048931 | -8.28750920  |
| 2                 | 19             | C2B              | 22.79390477        | 36.99706806 | -7.53663278  |
| 2                 | 20             | C3B              | 23.63399635        | 38.01727392 | -7.75727795  |
| 2                 | 21             | C4B              | 22.94696416        | 38.95575539 | -8.67478157  |
| 2                 | 22             | CMB              | 22.99516506        | 35.78228206 | -6.68167347  |
| 2                 | 23             | CAB              | 24.99237496        | 38.17333996 | -7.19939813  |
| 2                 | 24             | CBB              | 25.46601594        | 39.26684548 | -6.62798158  |
| 2                 | 25             | NC               | 21.59452140        | 40.89552685 | -10.53066713 |
| 2                 | 26             | C1C              | 22.82333370        | 41.02316568 | -10.08156194 |
| 2                 | 27             | C2C              | 23.43852120        | 42.23113806 | -10.58176446 |
| 2                 | 28             | C3C              | 22.50479234        | 42.83460357 | -11.36595601 |
| 2                 | 29             | C4C              | 21.32982151        | 41.99361187 | -11.33805420 |
| 2                 | 30             | CMC              | 24.83532204        | 42.68388458 | -10.26006688 |
| 2                 | 31             | CAC              | 22.62722364        | 44.14384437 | -12.09984414 |
| 2                 | 32             | CBC              | 22.14639251        | 45.34239716 | -11.27067565 |
| 2                 | 33             | ND               | 18.93547164        | 40.24084421 | -11.26055219 |
| 2                 | 34             | C1D              | 18.98522365        | 41.41922577 | -11.98812837 |
| 2                 | 35             | C2D              | 17.77469519        | 41.62372035 | -12.67886462 |
| 2                 | 36             | C3D              | 16.98418492        | 40.51841446 | -12.34024508 |
| 2                 | 37             | C4D              | 17.74981699        | 39.73145438 | -11.48663051 |
| 2                 | 38             | CMD              | 17.39613889        | 42.77231227 | -13.56798222 |
| 2                 | 39             | CAD              | 15.70525378        | 39.86722473 | -12.57236469 |

| <b>Pigment No</b> | <b>Atom No</b> | <b>Atom Name</b> | <b>Coordinates</b> |             |              |
|-------------------|----------------|------------------|--------------------|-------------|--------------|
| 2                 | 40             | OBD              | 14.77403645        | 40.18650576 | -13.24787309 |
| 2                 | 41             | CBD              | 15.72738343        | 38.54246400 | -11.73758681 |
| 2                 | 42             | CGD              | 14.62296390        | 38.53376068 | -10.70019713 |
| 2                 | 43             | O1D              | 13.95237149        | 37.58416376 | -10.44052296 |
| 2                 | 44             | O2D              | 14.51264405        | 39.69215192 | -10.07796221 |
| 2                 | 45             | CED              | 13.51158765        | 39.80334718 | -9.08294465  |
| 2                 | 46             | C1               | 13.14733109        | 34.17063133 | -9.88741517  |
| 2                 | 47             | H                | 20.48086192        | 35.57960127 | -7.69501180  |
| 2                 | 48             | H                | 24.48250016        | 40.32165194 | -8.91984837  |
| 2                 | 49             | H                | 20.09663135        | 43.11630303 | -12.58807547 |
| 2                 | 50             | H                | 16.51170965        | 35.28553025 | -7.40010897  |
| 2                 | 51             | H                | 17.03581318        | 36.96138544 | -7.34684913  |
| 2                 | 52             | H                | 18.05069269        | 35.70484742 | -6.65898768  |
| 2                 | 53             | H                | 16.89397115        | 35.67909434 | -12.11676565 |
| 2                 | 54             | H                | 18.36349486        | 35.05733084 | -11.42600249 |
| 2                 | 55             | H                | 16.91652068        | 33.38274838 | -10.10932654 |
| 2                 | 56             | H                | 16.93026029        | 33.19347731 | -11.85638354 |
| 2                 | 57             | H                | 22.92169722        | 34.87242360 | -7.26991861  |
| 2                 | 58             | H                | 22.24221516        | 35.72797711 | -5.90127202  |
| 2                 | 59             | H                | 23.96514602        | 35.79693534 | -6.20213198  |
| 2                 | 60             | H                | 25.62126839        | 37.30000922 | -7.24755885  |
| 2                 | 61             | H                | 24.87798289        | 40.16068181 | -6.52418397  |
| 2                 | 62             | H                | 26.46318736        | 39.29391521 | -6.22721331  |
| 2                 | 63             | H                | 25.07700211        | 43.60661635 | -10.77218447 |
| 2                 | 64             | H                | 25.57408659        | 41.94416061 | -10.55556414 |
| 2                 | 65             | H                | 24.96261332        | 42.86226387 | -9.19561285  |
| 2                 | 66             | H                | 22.06607425        | 44.09892345 | -13.02731224 |
| 2                 | 67             | H                | 23.66112134        | 44.29940689 | -12.38724705 |
| 2                 | 68             | H                | 21.10523725        | 45.22996458 | -10.98783149 |
| 2                 | 69             | H                | 22.24569542        | 46.26389262 | -11.83610598 |
| 2                 | 70             | H                | 22.72690782        | 45.44128662 | -10.35954745 |

| <b>Pigment No</b> | <b>Atom No</b> | <b>Atom Name</b> | <b>Coordinates</b> |             |              |
|-------------------|----------------|------------------|--------------------|-------------|--------------|
| 2                 | 71             | H                | 16.54725959        | 42.50267660 | -14.18271110 |
| 2                 | 72             | H                | 18.21179307        | 43.06354898 | -14.22144701 |
| 2                 | 73             | H                | 17.11429805        | 43.64268873 | -12.98149040 |
| 2                 | 74             | H                | 15.53740079        | 37.70899304 | -12.40163381 |
| 2                 | 75             | H                | 13.57092004        | 40.81686549 | -8.71941118  |
| 2                 | 76             | H                | 13.69736191        | 39.10464023 | -8.27958461  |
| 2                 | 77             | H                | 12.53655809        | 39.61264157 | -9.50657213  |
| 2                 | 78             | H                | 12.87667521        | 34.14608085 | -8.84321151  |
| 2                 | 79             | H                | 12.64474323        | 33.37847037 | -10.42315908 |
| 2                 | 80             | H                | 12.89701938        | 35.12573458 | -10.32053121 |
| 2                 | 81             | H                | 16.11609339        | 36.20985948 | -9.72994487  |
| 2                 | 82             | H                | 18.39023150        | 34.72372016 | -8.91983760  |
| 3                 | 1              | MG               | 29.81297856        | 35.16768082 | 6.07301951   |
| 3                 | 2              | CHA              | 28.61034904        | 34.96560629 | 9.27868294   |
| 3                 | 3              | CHB              | 27.51941285        | 37.57766250 | 5.41136004   |
| 3                 | 4              | CHC              | 30.99911927        | 35.40940034 | 2.90545637   |
| 3                 | 5              | CHD              | 32.12370650        | 32.69219344 | 6.75649599   |
| 3                 | 6              | NA               | 28.32769478        | 36.16972804 | 7.22205143   |
| 3                 | 7              | C1A              | 28.03211087        | 35.94574659 | 8.57293345   |
| 3                 | 8              | C2A              | 27.04056970        | 36.98827734 | 9.05704410   |
| 3                 | 9              | C3A              | 26.45657230        | 37.50408399 | 7.72699734   |
| 3                 | 10             | C4A              | 27.50776408        | 37.06401195 | 6.71970695   |
| 3                 | 11             | CMA              | 25.08596718        | 36.89693099 | 7.39783574   |
| 3                 | 12             | CAA              | 27.76359485        | 38.09485264 | 9.85229665   |
| 3                 | 13             | CBA              | 26.81947608        | 39.10388092 | 10.52929417  |
| 3                 | 14             | CGA              | 26.11480363        | 38.48429926 | 11.71422532  |
| 3                 | 15             | O1A              | 26.62201541        | 38.34058928 | 12.77967697  |
| 3                 | 16             | O2A              | 24.88104232        | 38.09969701 | 11.43029078  |
| 3                 | 17             | NB               | 29.32845452        | 36.27085075 | 4.44997489   |
| 3                 | 18             | C1B              | 28.37391244        | 37.20515425 | 4.38634468   |
| 3                 | 19             | C2B              | 28.34600349        | 37.79445612 | 3.03225365   |

| <b>Pigment No</b> | <b>Atom No</b> | <b>Atom Name</b> | <b>Coordinates</b> |             |             |
|-------------------|----------------|------------------|--------------------|-------------|-------------|
| 3                 | 20             | C3B              | 29.29260316        | 37.17163415 | 2.31724962  |
| 3                 | 21             | C4B              | 29.95071567        | 36.19922976 | 3.22064589  |
| 3                 | 22             | CMB              | 27.39098711        | 38.86462417 | 2.59657845  |
| 3                 | 23             | CAB              | 29.62560358        | 37.41536176 | 0.89934267  |
| 3                 | 24             | CBB              | 29.78150859        | 36.48231055 | -0.02354132 |
| 3                 | 25             | NC               | 31.31505610        | 34.20682140 | 5.01074127  |
| 3                 | 26             | C1C              | 31.65431737        | 34.44674499 | 3.76371909  |
| 3                 | 27             | C2C              | 32.76107690        | 33.61251233 | 3.35465704  |
| 3                 | 28             | C3C              | 33.07610495        | 32.84593909 | 4.43349341  |
| 3                 | 29             | C4C              | 32.16159812        | 33.21595465 | 5.48976724  |
| 3                 | 30             | CMC              | 33.39395365        | 33.62795177 | 1.99130222  |
| 3                 | 31             | CAC              | 34.13851261        | 31.78286257 | 4.52767245  |
| 3                 | 32             | CBC              | 33.61912173        | 30.38369992 | 4.17012951  |
| 3                 | 33             | ND               | 30.26962534        | 34.00322831 | 7.63720697  |
| 3                 | 34             | C1D              | 31.24582572        | 33.03474960 | 7.80903246  |
| 3                 | 35             | C2D              | 31.21268399        | 32.52892821 | 9.12318267  |
| 3                 | 36             | C3D              | 30.17303544        | 33.23147433 | 9.74554726  |
| 3                 | 37             | C4D              | 29.65534768        | 34.09955314 | 8.79039996  |
| 3                 | 38             | CMD              | 32.07764666        | 31.46272830 | 9.72970132  |
| 3                 | 39             | CAD              | 29.46810607        | 33.42729679 | 11.00176386 |
| 3                 | 40             | OBD              | 29.60740005        | 32.90883567 | 12.06817606 |
| 3                 | 41             | CBD              | 28.39856689        | 34.54038696 | 10.73797172 |
| 3                 | 42             | CGD              | 26.99677366        | 34.01466103 | 10.97139875 |
| 3                 | 43             | O1D              | 26.13307956        | 34.62437370 | 11.52015587 |
| 3                 | 44             | O2D              | 26.82184213        | 32.81229854 | 10.45664615 |
| 3                 | 45             | CED              | 25.54690497        | 32.21685811 | 10.61323748 |
| 3                 | 46             | C1               | 24.16894437        | 37.42537579 | 12.45960461 |
| 3                 | 47             | H                | 26.78827961        | 38.33191778 | 5.19297250  |
| 3                 | 48             | H                | 31.39586975        | 35.49951335 | 1.91460169  |
| 3                 | 49             | H                | 32.85098266        | 31.93331416 | 6.98047623  |
| 3                 | 50             | H                | 24.72934973        | 37.22616546 | 6.42833913  |



| <b>Pigment No</b> | <b>Atom No</b> | <b>Atom Name</b> | <b>Coordinates</b> |             |             |
|-------------------|----------------|------------------|--------------------|-------------|-------------|
| 3                 | 51             | H                | 24.36099460        | 37.19397689 | 8.14786369  |
| 3                 | 52             | H                | 25.13479536        | 35.81248626 | 7.38718864  |
| 3                 | 53             | H                | 28.42816937        | 38.63384704 | 9.18272765  |
| 3                 | 54             | H                | 28.38988590        | 37.65164769 | 10.61682807 |
| 3                 | 55             | H                | 26.09016799        | 39.49508323 | 9.83125584  |
| 3                 | 56             | H                | 27.40643355        | 39.93022401 | 10.91113059 |
| 3                 | 57             | H                | 27.53925638        | 39.12239868 | 1.55609892  |
| 3                 | 58             | H                | 27.51502019        | 39.76567079 | 3.18980409  |
| 3                 | 59             | H                | 26.36221336        | 38.53703941 | 2.71191203  |
| 3                 | 60             | H                | 29.71488981        | 38.44941653 | 0.61074375  |
| 3                 | 61             | H                | 29.67688963        | 35.43520729 | 0.19582543  |
| 3                 | 62             | H                | 30.00508210        | 36.74373905 | -1.04205323 |
| 3                 | 63             | H                | 33.78422166        | 34.61074333 | 1.74203039  |
| 3                 | 64             | H                | 32.68179505        | 33.35562212 | 1.21689867  |
| 3                 | 65             | H                | 34.21708420        | 32.92717939 | 1.93229858  |
| 3                 | 66             | H                | 34.96148748        | 32.03799703 | 3.86937727  |
| 3                 | 67             | H                | 34.55494682        | 31.76754215 | 5.52939130  |
| 3                 | 68             | H                | 33.24302875        | 30.35804621 | 3.15286800  |
| 3                 | 69             | H                | 32.80990933        | 30.08670228 | 4.82862134  |
| 3                 | 70             | H                | 34.41229705        | 29.64729459 | 4.25563198  |
| 3                 | 71             | H                | 31.72948333        | 30.47249964 | 9.44820818  |
| 3                 | 72             | H                | 32.04468565        | 31.52625096 | 10.80959468 |
| 3                 | 73             | H                | 33.11165857        | 31.55212910 | 9.41385928  |
| 3                 | 74             | H                | 28.55138015        | 35.34498501 | 11.44576068 |
| 3                 | 75             | H                | 25.61842070        | 31.24517664 | 10.15104646 |
| 3                 | 76             | H                | 24.78893658        | 32.81115737 | 10.12294898 |
| 3                 | 77             | H                | 25.30362821        | 32.11759027 | 11.66084117 |
| 3                 | 78             | H                | 23.20095775        | 37.19636296 | 12.04154802 |
| 3                 | 79             | H                | 24.06194301        | 38.06729042 | 13.32194028 |
| 3                 | 80             | H                | 24.68553105        | 36.52002191 | 12.73514612 |
| 3                 | 81             | H                | 26.27711609        | 36.54020724 | 9.67792593  |

| <b>Pigment No</b> | <b>Atom No</b> | <b>Atom Name</b> | <b>Coordinates</b> |             |             |
|-------------------|----------------|------------------|--------------------|-------------|-------------|
| 3                 | 82             | H                | 26.36848483        | 38.58473140 | 7.71559565  |
| 4                 | 1              | MG               | 21.84908084        | 30.01240908 | 8.47564178  |
| 4                 | 2              | CHA              | 25.02828298        | 28.72831264 | 8.36403023  |
| 4                 | 3              | CHB              | 21.70548427        | 29.83387097 | 5.09262792  |
| 4                 | 4              | CHC              | 18.70527512        | 31.28113979 | 8.55467431  |
| 4                 | 5              | CHD              | 22.06705668        | 30.32145224 | 11.90986015 |
| 4                 | 6              | NA               | 23.16631226        | 29.30158050 | 6.96285528  |
| 4                 | 7              | C1A              | 24.44350328        | 28.76075022 | 7.15975565  |
| 4                 | 8              | C2A              | 24.97349009        | 28.21643133 | 5.84558694  |
| 4                 | 9              | C3A              | 24.08028172        | 28.94768511 | 4.82388941  |
| 4                 | 10             | C4A              | 22.90001363        | 29.38205673 | 5.67934281  |
| 4                 | 11             | CMA              | 24.77263677        | 30.15643677 | 4.17966675  |
| 4                 | 12             | CAA              | 24.80495065        | 26.68416263 | 5.78803214  |
| 4                 | 13             | CBA              | 25.46459059        | 26.02200433 | 4.56551523  |
| 4                 | 14             | CGA              | 26.97059984        | 26.01204816 | 4.69338707  |
| 4                 | 15             | O1A              | 27.56958868        | 25.22644091 | 5.35454160  |
| 4                 | 16             | O2A              | 27.54719599        | 26.98550943 | 4.00728418  |
| 4                 | 17             | NB               | 20.44576205        | 30.43093219 | 7.08279395  |
| 4                 | 18             | C1B              | 20.58414996        | 30.30126525 | 5.75917634  |
| 4                 | 19             | C2B              | 19.34413281        | 30.73714734 | 5.08559979  |
| 4                 | 20             | C3B              | 18.48644850        | 31.10276038 | 6.04804557  |
| 4                 | 21             | C4B              | 19.18975887        | 30.93992240 | 7.34174098  |
| 4                 | 22             | CMB              | 19.13728559        | 30.71433716 | 3.60102575  |
| 4                 | 23             | CAB              | 17.10588185        | 31.58971454 | 5.85616394  |
| 4                 | 24             | CBB              | 16.04544330        | 31.17159349 | 6.52507971  |
| 4                 | 25             | NC               | 20.59452865        | 30.68357361 | 9.98737495  |
| 4                 | 26             | C1C              | 19.37982635        | 31.16039171 | 9.82866133  |
| 4                 | 27             | C2C              | 18.80329396        | 31.55064303 | 11.09486826 |
| 4                 | 28             | C3C              | 19.74420912        | 31.27826217 | 12.03908310 |
| 4                 | 29             | C4C              | 20.88652960        | 30.73022710 | 11.34392522 |
| 4                 | 30             | CMC              | 17.43199627        | 32.14029127 | 11.27207831 |

| <b>Pigment No</b> | <b>Atom No</b> | <b>Atom Name</b> | <b>Coordinates</b> |             |             |
|-------------------|----------------|------------------|--------------------|-------------|-------------|
| 4                 | 31             | CAC              | 19.65881068        | 31.52751450 | 13.52173292 |
| 4                 | 32             | CBC              | 20.20769394        | 32.90097016 | 13.93109177 |
| 4                 | 33             | ND               | 23.23456771        | 29.65856998 | 9.87778688  |
| 4                 | 34             | C1D              | 23.20475403        | 29.79950538 | 11.25590087 |
| 4                 | 35             | C2D              | 24.41438707        | 29.35320615 | 11.82359311 |
| 4                 | 36             | C3D              | 25.18328686        | 28.93472047 | 10.73097196 |
| 4                 | 37             | C4D              | 24.40835901        | 29.14980276 | 9.59608531  |
| 4                 | 38             | CMD              | 24.79695016        | 29.31256732 | 13.27489193 |
| 4                 | 39             | CAD              | 26.45753946        | 28.35640869 | 10.33682950 |
| 4                 | 40             | OBD              | 27.39834040        | 28.01443410 | 10.98750755 |
| 4                 | 41             | CBD              | 26.41777000        | 28.22392859 | 8.77672508  |
| 4                 | 42             | CGD              | 27.52552521        | 29.03577605 | 8.13663207  |
| 4                 | 43             | O1D              | 28.19490988        | 28.65947423 | 7.22612449  |
| 4                 | 44             | O2D              | 27.64117526        | 30.23471192 | 8.67564502  |
| 4                 | 45             | CED              | 28.64799449        | 31.08566491 | 8.15928197  |
| 4                 | 46             | C1               | 28.95767659        | 27.10923311 | 4.13553755  |
| 4                 | 47             | H                | 21.66685780        | 29.81061354 | 4.02065983  |
| 4                 | 48             | H                | 17.72101689        | 31.70268739 | 8.58447480  |
| 4                 | 49             | H                | 22.13870150        | 30.40675522 | 12.97899089 |
| 4                 | 50             | H                | 24.10155977        | 30.69040845 | 3.51627430  |
| 4                 | 51             | H                | 25.63110641        | 29.82687272 | 3.60453401  |
| 4                 | 52             | H                | 25.12076607        | 30.85262129 | 4.93642077  |
| 4                 | 53             | H                | 25.21864849        | 26.23341407 | 6.68193806  |
| 4                 | 54             | H                | 23.74496563        | 26.44560058 | 5.78393391  |
| 4                 | 55             | H                | 25.14808037        | 24.98743014 | 4.51487655  |
| 4                 | 56             | H                | 25.17755325        | 26.51400926 | 3.64480431  |
| 4                 | 57             | H                | 19.84754889        | 31.36255279 | 3.09629354  |
| 4                 | 58             | H                | 18.13898497        | 31.03965768 | 3.33915039  |
| 4                 | 59             | H                | 19.27213631        | 29.71208083 | 3.20600396  |
| 4                 | 60             | H                | 16.97216729        | 32.32470477 | 5.08006305  |
| 4                 | 61             | H                | 16.10986297        | 30.41980372 | 7.29068206  |

| <b>Pigment No</b> | <b>Atom No</b> | <b>Atom Name</b> | <b>Coordinates</b> |             |             |
|-------------------|----------------|------------------|--------------------|-------------|-------------|
| 4                 | 62             | H                | 15.06711547        | 31.56262061 | 6.31143163  |
| 4                 | 63             | H                | 16.65826295        | 31.47401023 | 10.90047299 |
| 4                 | 64             | H                | 17.33082326        | 33.08308084 | 10.74146217 |
| 4                 | 65             | H                | 17.21935783        | 32.33357850 | 12.31589538 |
| 4                 | 66             | H                | 20.19560386        | 30.75066937 | 14.05616044 |
| 4                 | 67             | H                | 18.62573407        | 31.44581372 | 13.84084262 |
| 4                 | 68             | H                | 21.24978475        | 33.00595392 | 13.64889410 |
| 4                 | 69             | H                | 20.13260521        | 33.03874469 | 15.00539156 |
| 4                 | 70             | H                | 19.65344447        | 33.69920998 | 13.44888560 |
| 4                 | 71             | H                | 25.85225519        | 29.09579865 | 13.37487580 |
| 4                 | 72             | H                | 24.24752356        | 28.53887665 | 13.80418172 |
| 4                 | 73             | H                | 24.59485692        | 30.25729860 | 13.76978671 |
| 4                 | 74             | H                | 26.59535117        | 27.18985236 | 8.51019611  |
| 4                 | 75             | H                | 28.59228722        | 31.99214656 | 8.74073603  |
| 4                 | 76             | H                | 28.46577587        | 31.29736723 | 7.11520459  |
| 4                 | 77             | H                | 29.62031571        | 30.62833747 | 8.26866345  |
| 4                 | 78             | H                | 29.44437267        | 26.20806829 | 3.79179070  |
| 4                 | 79             | H                | 29.22051453        | 27.30203838 | 5.16321838  |
| 4                 | 80             | H                | 29.23425784        | 27.94468535 | 3.51122330  |
| 4                 | 81             | H                | 26.01646777        | 28.46790022 | 5.71153937  |
| 4                 | 82             | H                | 23.73766114        | 28.28462954 | 4.03741258  |

Table S16: Same as in Table S2, but using Hartree-Fock for the geometry optimization. The attachments to this document include the above cartesian atomic coordinates in the file *table\_s16\_coordinates.xyz*.

| $N$ | Embedding | $\omega^N$ (eV) | $\mu^N$ (D) | $\vartheta^N$ ( $^\circ$ ) | $\varphi^N$ ( $^\circ$ ) |
|-----|-----------|-----------------|-------------|----------------------------|--------------------------|
| 1   | none      | 2.786           | 5.27        | -1.0                       | -9.5                     |
|     | impl      | 2.776           | 6.06        | -1.0                       | -7.9                     |
|     | impl+expl | 2.776           | 3.48        | -2.1                       | -5.6                     |
| 2   | none      | 2.785           | 5.27        | -0.9                       | -9.5                     |
|     | impl      | 2.775           | 6.06        | -1.0                       | -7.6                     |
|     | impl+expl | 2.775           | 3.45        | -2.9                       | -4.8                     |
| 3   | none      | 2.787           | 5.26        | -0.9                       | -9.4                     |
|     | impl      | 2.776           | 6.06        | -1.0                       | -7.7                     |
|     | impl+expl | 2.776           | 3.48        | -4.0                       | -6.4                     |
| 4   | none      | 2.781           | 5.29        | -1.4                       | -9.8                     |
|     | impl      | 2.772           | 6.06        | -1.6                       | -8.1                     |
|     | impl+expl | 2.772           | 3.48        | -2.3                       | -5.2                     |

Table S17: Same as in Table 1 of the main text, but using HF-CIS and the geometry from Table S16.

| $M$ | $N$ | $V_{MN}^{ES}(\epsilon=1)$ | $V_{MN}^{ES}(\epsilon=2)$ | $V_{MN}^{ES}(\epsilon=2)+V_{MN}^{solv}(\epsilon=2)$ | $f_{MN}^{rf}$ | $s_{MN}$ |
|-----|-----|---------------------------|---------------------------|-----------------------------------------------------|---------------|----------|
| 3   | 4   | 156                       | 203                       | 125                                                 | 1.299         | 0.619    |
| 1   | 2   | 155                       | 202                       | 126                                                 | 1.303         | 0.622    |
| 2   | 3   | 25                        | 33                        | 20                                                  | 1.302         | 0.604    |
| 1   | 4   | 25                        | 33                        | 20                                                  | 1.300         | 0.604    |
| 2   | 4   | 9                         | 12                        | 9                                                   | 1.444         | 0.693    |
| 1   | 3   | 7                         | 10                        | 7                                                   | 1.448         | 0.714    |

Table S18: Same as in Table 2 of the main text, but using HF-CIS and the geometry from Table S16.

| $M$ | $N$ | $\epsilon_s=2$ | $\epsilon_s=4$ | $\epsilon_s=10$ | $\epsilon_s=20$ |
|-----|-----|----------------|----------------|-----------------|-----------------|
| 3   | 4   | 91             | 92             | 93              | 93              |
| 1   | 2   | 89             | 90             | 91              | 91              |
| 2   | 3   | 21             | 21             | 21              | 20              |
| 1   | 4   | 20             | 19             | 19              | 19              |
| 2   | 4   | 7              | 7              | 7               | 7               |
| 1   | 3   | 6              | 6              | 6               | 6               |

Table S19: Calibrated excitonic couplings (in units of 1/cm) between 0-0 transitions of Chl *a* pigments in WSCP, obtained by using different values for the static dielectric constant  $\epsilon_s$ . The original data are given in Tables S6 and S7 ( $\epsilon_s=2$ ), Tables S8 and S9 ( $\epsilon_s=10$ ), and Tables S10 and S11 ( $\epsilon_s=2$ ). The values of the 4<sup>th</sup> column ( $\epsilon_s=4$ ) are identical with that of the 3<sup>rd</sup> column in Table 8 of the main text.

## Comparison of ESP of TrEsp Charges fitted with and without solvent

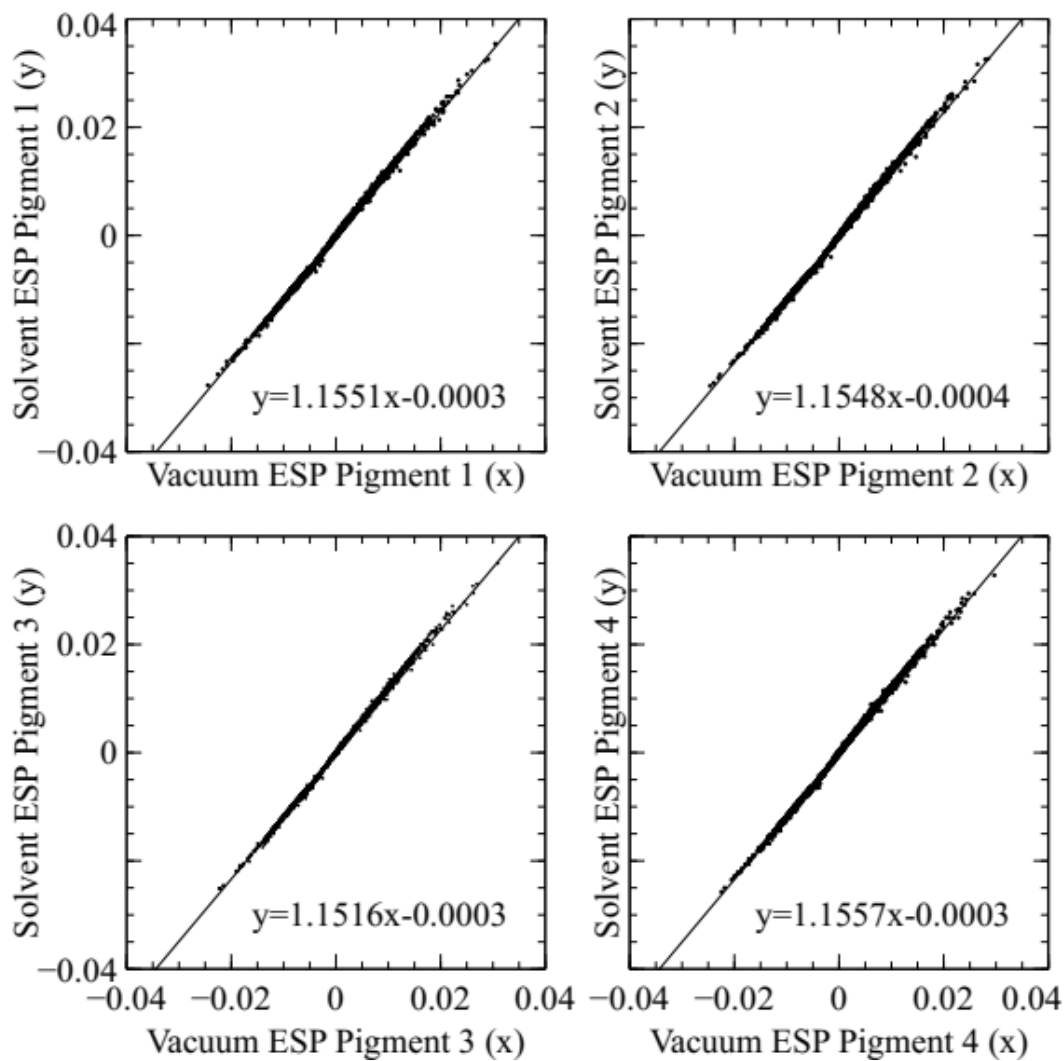

Figure S3: Electrostatic potential from the transition density at the evaluation points used for fitting the charges in Table S2 compared between vacuum and solvent environment for each individual pigment. The thin black lines are result from individual linear regressions.

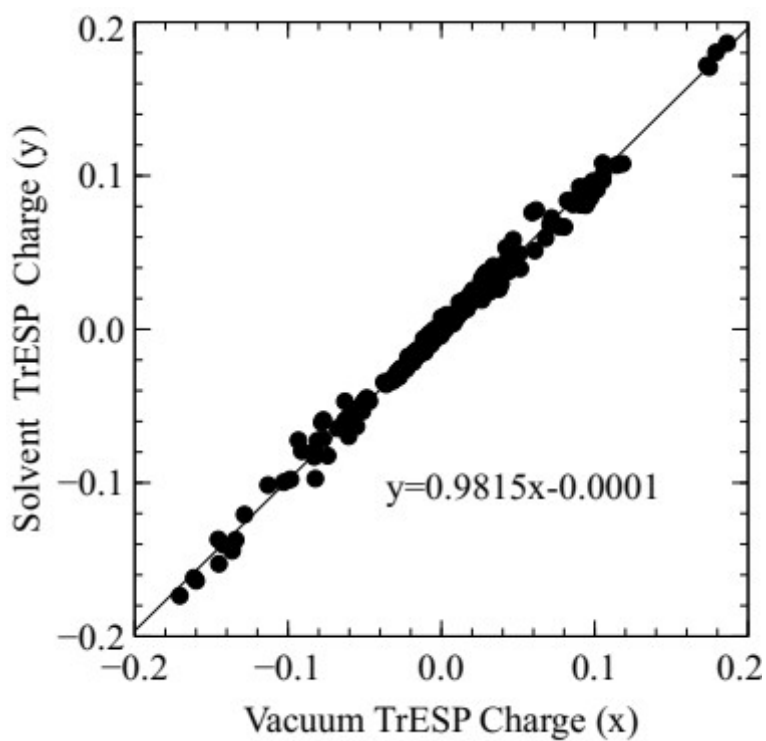

Figure S4: Vacuum TrESP Charges vs. Solvent TrESP Charges from Table S2, all pigments. The thin black line is the result of a linear regression. Although the transition dipole moments of the TrESP charges changes by a factor of 1.2 (see Table 1 of the main text), there is no consistent scaling of the TrESP charges. This is because the charges are not uniquely determined by the ESP, that is fitted by a least squares procedure.



## Dipole strengths at varying refractive indices

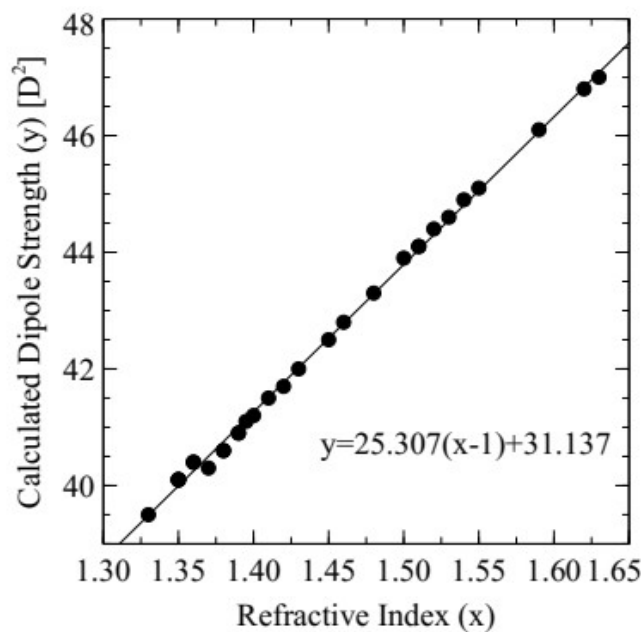

Figure S5: Dependence of dipole strength of pigment 1, calculated with TDDFT/PCM with the CAM-B3LYP XC-functional, on the refractive index (coordinates taken from Table S2). The inset shows the result of a linear regression.

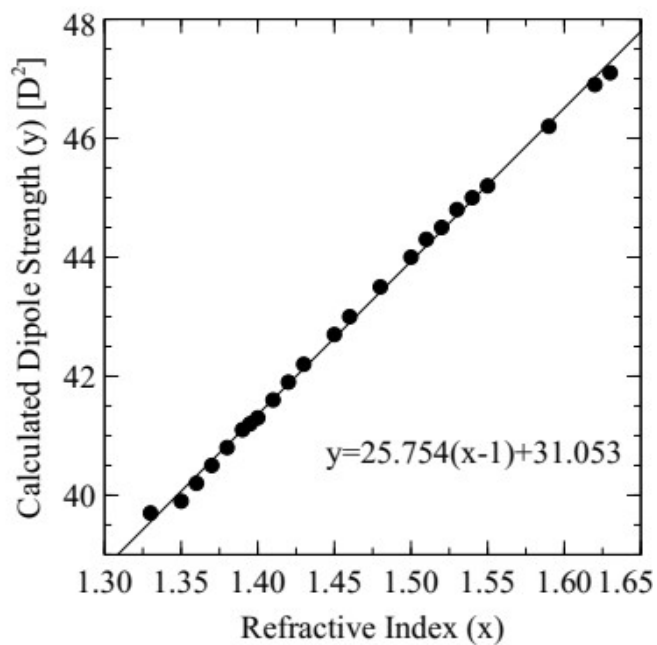

Figure S6: Same as Figure S5 but for Pigment 2.

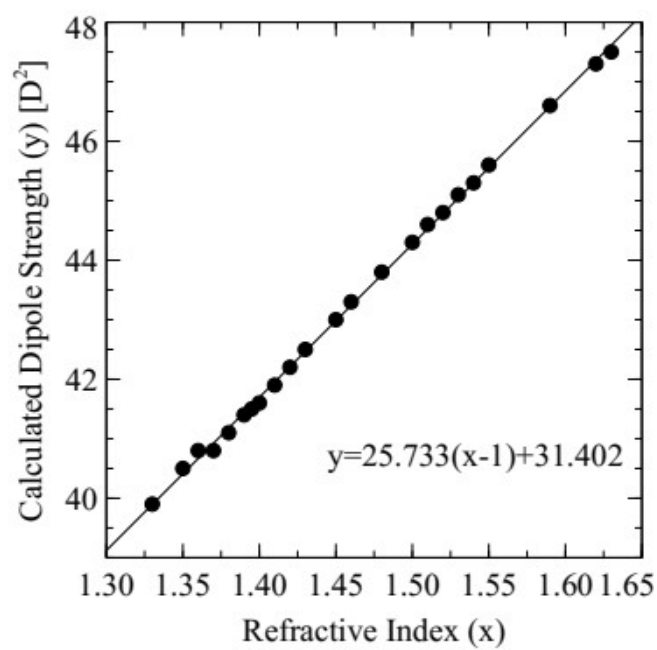

Figure S7: Same as Figure S5 but for Pigment 3.

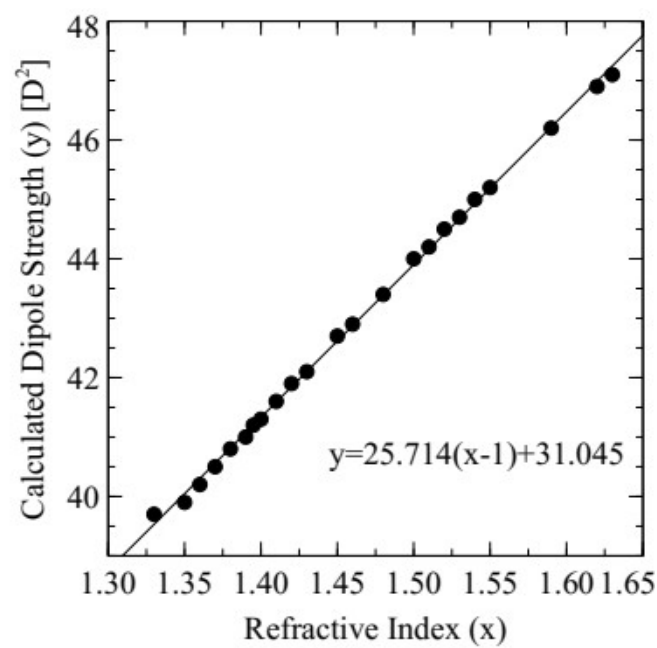

Figure S8: Same as Figure S5 but for Pigment 4.

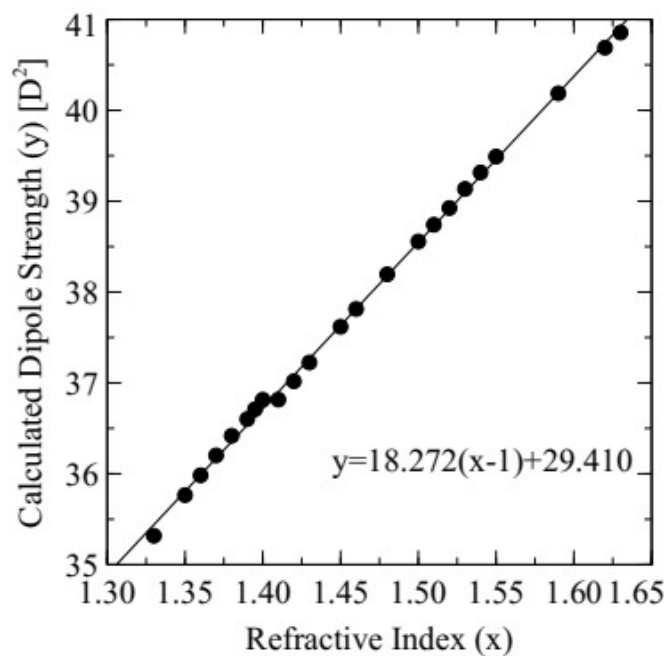

Figure S9: Same as Figure S5 but using HF/CIS calculations.

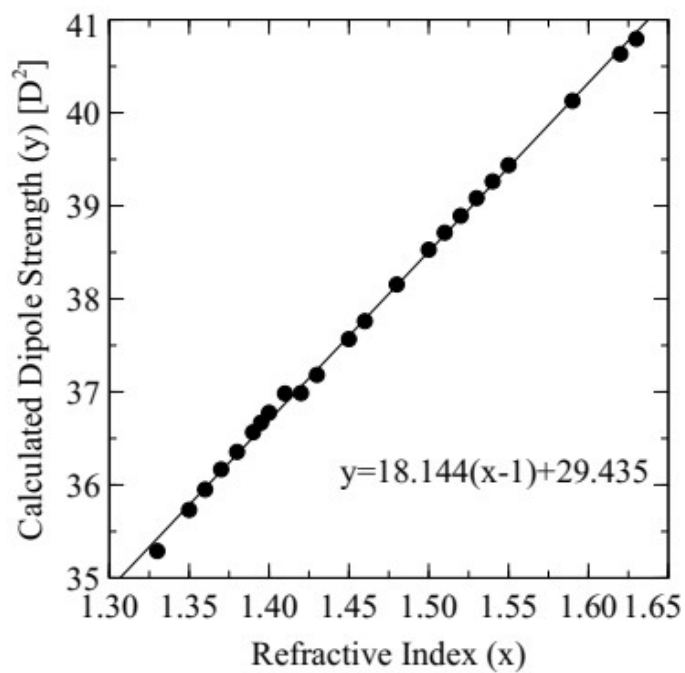

Figure S10: Same as Figure S9 but for pigment 2.

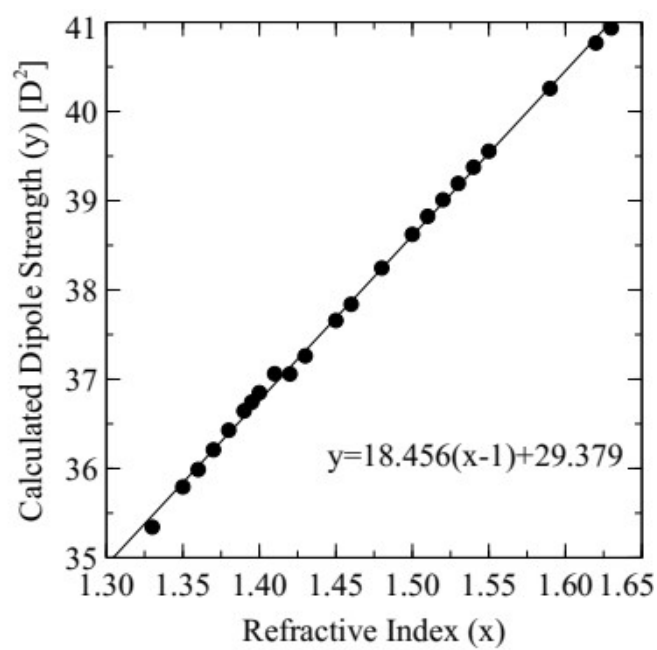

Figure S11: Same as Figure S9 but for Pigment 3.

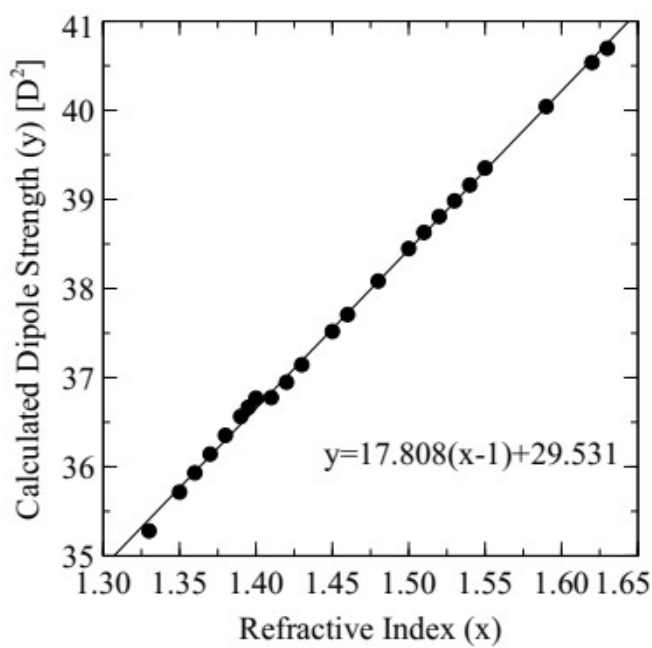

Figure S12: Same as Figure S9 but for Pigment 4.
